# Supplementary material for: Acacia Plantation Development and the Configuration of Tree Farmers’ Agricultural Assets and Land Management—A Survey in Central Vietnam
Source: MDPI journal article supplement (doi:10.3390/land10121304), 2021-11-26
Supplement: s1 [file s1]

## Supplementary Materials

### Supplementary S1: household questionnaire questions, data summary, and statistical models

**Table S1.** Summary of Part 1 variables (Acacia plantation owners profile). The table summarizes the questions posed in the questionnaire and the respective question number (as in questionnaire order) and variable name. The data type refers to continuous interval (CI), discrete interval (DI), binary (B), ordinal (O), and nominal (N) data, whereby qualitative statements (QS) were mostly analyzed and converted to N/O/B data. Summary statistics are – depending on data type – either frequencies, or the mean  $\pm$  the standard deviation (and in brackets the response frequencies [number of observations with values  $>0$ ] and the data range). Interval data were normally distributed ( $\sim n$ ) or were – for statistical analyses – transformed to a natural logarithm ( $>\ln$ ), a power function from a Box-Cox ( $>b$ ) or Johnson ( $>j$ ) transformation, or a normal score transformation ( $>s$ ). Predictor variables tested [variable number in brackets with coefficient sign  $+/-$ ] and the corresponding tests and statistics are summarized in the right column. Predictor variables significant at  $p < 0.05$ ,  $< 0.005$ , and  $< 0.0005$  are indicated with one, two or three stars (\*) respectively (n.s. = no significant tested variables). GLM refers to general linear model, BLR binary logistic regression, OLR ordinal logistic regression, NLR nominal logistic regression, SLR simple linear regression, MLR multiple linear regression, Chisq to the Chi-Square test, and KW to the Kruskal-Wallis test. Where BLR did not work due to quasi-complete separation of data points, we sometimes used MLR (indicated with a hash: MLR<sup>#</sup>) to show data inter-relations (binary data used for this test however violates the normality assumption and results may be less reliable).

| QQ No                                            | Variable name                                                                                                                                                        | Data type | Questionnaire question / information                                                                                                                                                                                                                                                                                |
|--------------------------------------------------|----------------------------------------------------------------------------------------------------------------------------------------------------------------------|-----------|---------------------------------------------------------------------------------------------------------------------------------------------------------------------------------------------------------------------------------------------------------------------------------------------------------------------|
|                                                  | Summary statistics                                                                                                                                                   |           | Statistical test and predictor variables                                                                                                                                                                                                                                                                            |
| <b>Part 1: Acacia plantation owners' profile</b> |                                                                                                                                                                      |           |                                                                                                                                                                                                                                                                                                                     |
| <b>Q1a</b>                                       | <i>district</i>                                                                                                                                                      | N         | District                                                                                                                                                                                                                                                                                                            |
|                                                  | Phu Loc (70), Huong Tra (70), A Luoi (40)                                                                                                                            |           |                                                                                                                                                                                                                                                                                                                     |
| <b>Q1b</b>                                       | <i>commune</i>                                                                                                                                                       | N         | Commune                                                                                                                                                                                                                                                                                                             |
|                                                  | Phu Loc: Loc Bon (23), Loc Son (23), Xuan Loc (24); Huong Tra: Binh Dien (29), Huong Ho (21), Huong Tho (20); A Luoi: Dong Son (16), Hong Thuong (15), Huong Lam (9) |           |                                                                                                                                                                                                                                                                                                                     |
| <b>Q2a</b>                                       | <i>fsc</i>                                                                                                                                                           | B         | member (y/n) of Forest Stewardship Council (FSC) certification scheme                                                                                                                                                                                                                                               |
|                                                  | yes (90), no (90)                                                                                                                                                    |           | Only analysing data of <i>sawlog</i> (1), i.e. <i>fsc</i> ( <i>sawlog</i> ):<br>BLR [ $+districtAL^{**}$ , $+education^{***}$ , $+plantduration^{*}$ , $+plotnumber^{*}$ ] $R^2=25\%$ ;<br>BLR [ $+districtAL^{***}$ , $+education^{***}$ , $-plneedloan^{*}$ , $+plspcount^{***}$ ] $R^2=39\%$                     |
| <b>Q2a1</b>                                      | <i>fscexploit</i>                                                                                                                                                    | B         | FSC member who already harvested wood (exploited profits from FSC)                                                                                                                                                                                                                                                  |
|                                                  | yes (27),<br>no (153)                                                                                                                                                |           | Only analysing data of <i>fsc</i> (1), i.e. <i>fscexploit</i> ( <i>fsc</i> ): BLR [ $-districtPL^{*}$ , $+education^{*}$ , $+plantduration^{**}$ , $+plotnumber^{**}$ , $+plotsizemax^{*}$ ] $R^2=33\%$ ;<br>BLR [ $-districtPL^{***}$ , $+plantduration^{*}$ , $+plotareatot^{**}$ , $+plspWWF^{***}$ ] $R^2=50\%$ |
| <b>Q2b</b>                                       | <i>sawlog</i>                                                                                                                                                        | B         | owner (y/n) of acacia plantations for sawlog production                                                                                                                                                                                                                                                             |
|                                                  | yes (118),<br>no (62)                                                                                                                                                |           | BLR [ $+districtAL^{**}$ , $+districtPL^{*}$ , $-genderW^{*}$ , $+education^{*}$ , $+plsttraining^{**}$ , $+plestlandbush^{**}$ , $+plotareatot^{***}$ ] $R^2=51\%$                                                                                                                                                 |
| <b>Q2c</b>                                       | <i>woodchip</i>                                                                                                                                                      | B         | owner (y/n) of acacia plantations for woodchip production                                                                                                                                                                                                                                                           |
|                                                  | yes (90), no (90)                                                                                                                                                    |           | --                                                                                                                                                                                                                                                                                                                  |
| <b>Q3</b>                                        | <i>gender</i>                                                                                                                                                        | B         | respondent was a man or woman                                                                                                                                                                                                                                                                                       |
|                                                  | men (148), women (32)                                                                                                                                                |           | n.s.                                                                                                                                                                                                                                                                                                                |

|             |                                                                |       |                                                                                                                                                                                                                                                                                                                                                                                                                 |
|-------------|----------------------------------------------------------------|-------|-----------------------------------------------------------------------------------------------------------------------------------------------------------------------------------------------------------------------------------------------------------------------------------------------------------------------------------------------------------------------------------------------------------------|
| <b>Q4</b>   | <i>age</i>                                                     | CI >b | age of the respondent                                                                                                                                                                                                                                                                                                                                                                                           |
|             | 52.2 ± 9.6 (28-79)                                             |       | T-Test [- <i>ethnmin</i> ***]; GLM [ <i>district</i> ***] R <sup>2</sup> =20%;                                                                                                                                                                                                                                                                                                                                  |
| <b>Q5</b>   | <i>ethnicity</i>                                               | N     | ethnicity of the respondent                                                                                                                                                                                                                                                                                                                                                                                     |
|             | Kinh (138), Bru Van Kieu (3), Co Tu (8), Pa Co (24), Ta Oi (7) |       |                                                                                                                                                                                                                                                                                                                                                                                                                 |
| <b>Q5_1</b> | <i>ethnmin</i>                                                 | B     | whether (1) or not (0) the respondent is of a minority ethnicity                                                                                                                                                                                                                                                                                                                                                |
|             | minority (42), Kinh (138)                                      |       | Chisq [- <i>districtAL</i> ***]                                                                                                                                                                                                                                                                                                                                                                                 |
| <b>Q6</b>   | <i>education</i>                                               | DI ~n | number of years the respondent was in school                                                                                                                                                                                                                                                                                                                                                                    |
|             | 7.4 ± 3.7 (0-16)                                               |       | MLR [- <i>age</i> **, - <i>genderW</i> ***, - <i>ethnmin</i> **] R <sup>2</sup> =13%; MLR [- <i>age</i> ***, - <i>genderW</i> ***, - <i>ethnmin</i> ***, + <i>honorary</i> ***, + <i>fsc</i> ***] R <sup>2</sup> =43%; GLM [- <i>districtAL</i> *, + <i>sawlog</i> **, + <i>fsc(sawlog)</i> ***, + <i>fscexploit(fsc)</i> *, - <i>age</i> ***, - <i>genderW</i> ***, + <i>honorary</i> ***] R <sup>2</sup> =44% |
| <b>Q7</b>   | <i>depchild</i>                                                | DI ~n | number of children in the household                                                                                                                                                                                                                                                                                                                                                                             |
|             | 2.2 ± 1.1 (0-6)                                                |       | MLR [ <i>district</i> *, - <i>age</i> ***, - <i>education</i> **] R <sup>2</sup> =14%                                                                                                                                                                                                                                                                                                                           |
| <b>Q8</b>   | <i>depparent</i>                                               | DI ~n | number of parents supported by the household                                                                                                                                                                                                                                                                                                                                                                    |
|             | 0.3 ± 0.5 (0-2)                                                |       | SLR [- <i>age</i> ***] R <sup>2</sup> =10%                                                                                                                                                                                                                                                                                                                                                                      |

**Table S2.** Summary of Part 1 (Acacia plantation owners profile) and Part 2 variables (History and involvement in plantation forestry). For descriptions of table content and summary statistics refer to Table S1.

| QQ No                                                  | Variable name                                       | Data type | Questionnaire question / information                                                                                                                                                                                                                                                       |
|--------------------------------------------------------|-----------------------------------------------------|-----------|--------------------------------------------------------------------------------------------------------------------------------------------------------------------------------------------------------------------------------------------------------------------------------------------|
| transf.                                                | Summary statistics                                  |           | Statistical test and predictor variables                                                                                                                                                                                                                                                   |
| Part 1: Acacia plantation owners' profile [continued]  |                                                     |           |                                                                                                                                                                                                                                                                                            |
| Q7+8                                                   | <i>dependents</i>                                   | DI ~n     | number of all dependents (children and parents) in the household                                                                                                                                                                                                                           |
|                                                        | 2.5 ± 1.4 (0-7)                                     |           | MLR [ <i>district*</i> , - <i>age***</i> , - <i>education*</i> ] R <sup>2</sup> =18%                                                                                                                                                                                                       |
| Q9                                                     | <i>honorary</i>                                     | B         | respondent has (1) a honorary position in the community (e.g. village or commune head) or in an organisation                                                                                                                                                                               |
|                                                        | yes (38), no (142)                                  |           | BLR [ <i>+districtAL*</i> , <i>+age*</i> , <i>+education***</i> ] R <sup>2</sup> =17%                                                                                                                                                                                                      |
| Part 2: History and involvement in plantation forestry |                                                     |           |                                                                                                                                                                                                                                                                                            |
| Q10                                                    | <i>firstplanttype</i>                               | N         | “What was the first type of plantation you planted before you planted acacia?”                                                                                                                                                                                                             |
|                                                        | eucalypt (67), rubber (11), cassava (79), none (23) |           | Chisq [ <i>district***</i> ]; in PL and HT <i>firsteucalypt</i> : BLR [ <i>+plantduration**</i> ] R <sup>2</sup> =10%; <i>firstnotree</i> : BLR [ <i>-plantduration***</i> , <i>-sawlog*</i> ] R <sup>2</sup> =9%                                                                          |
| Q11                                                    | <i>firstyearplant</i>                               | DI ~n     | “In which year did you first plant acacia species?”                                                                                                                                                                                                                                        |
|                                                        | median 1999 (1990-2013)                             |           | (cf. Q11_1 below)                                                                                                                                                                                                                                                                          |
| Q11_1                                                  | <i>plantduration</i>                                | DI ~n     | time (years) since first establishment of acacia plantations                                                                                                                                                                                                                               |
|                                                        | 17.9 ± 5.7 (5-28)                                   |           | MLR [ <i>-districtAL***</i> , <i>+districtPL*</i> , <i>+age***</i> , <i>+education*</i> ] R <sup>2</sup> =52%;<br>MLR [ <i>-districtAL***</i> , <i>+districtPL*</i> , <i>+firsteucalypt***</i> , <i>+plrprogram***</i> ] R <sup>2</sup> =65%; T-test [ <i>+sawlog*</i> ], [ <i>+fsc*</i> ] |
| Q12a                                                   | <i>plantreason</i>                                  | QS        | “What were the reasons that lead you to initially set up acacia plantations?”                                                                                                                                                                                                              |
| Q12a1                                                  | <i>plrsoilimprove</i>                               | B         | A: “After eucalypt plantation soil was only suitable for planting acacia”                                                                                                                                                                                                                  |
|                                                        | stated by 16                                        |           | -                                                                                                                                                                                                                                                                                          |
| Q12a2                                                  | <i>plr easysell</i>                                 | B         | A: “I have understood (or seen) that I can gain money from this species”                                                                                                                                                                                                                   |
|                                                        | stated by 12                                        |           | -                                                                                                                                                                                                                                                                                          |

|         |                      |    |                                                                                                                                                                                                                          |
|---------|----------------------|----|--------------------------------------------------------------------------------------------------------------------------------------------------------------------------------------------------------------------------|
| Q12a3_1 | <i>plrresettle</i>   | B  | A: “I moved in 2004 due to a resettlement policy. I started planting acacia here.”                                                                                                                                       |
|         | stated by 2          |    | (data incorporated for analysis into Q12a3_2 <i>plrlearn</i> )                                                                                                                                                           |
| Q12a3_2 | <i>plrlearn</i>      | B  | A: “I saw how other people planted acacia and learned about it from them.”                                                                                                                                               |
|         | stated by 110        |    | BLR [- <i>districtAL</i> ***, + <i>districtPL</i> **, - <i>age</i> *, - <i>education</i> ***, - <i>genderW</i> *, - <i>plantduration</i> ***] R <sup>2</sup> =27% (includes data Q12a3_1)                                |
| Q12a5   | <i>plrprogram</i>    | B  | A: “The state encouraged people to plant acacia for re-greening. I was involved in a tree plantation program (e.g. Program 327).”                                                                                        |
|         | stated by 52         |    | BLR [+ <i>districtAL</i> ***, - <i>districtPL</i> ***, + <i>honorary</i> *, + <i>plantduration</i> ***] R <sup>2</sup> =29%; BLR [ <i>district</i> ***, + <i>plantduration</i> ***, + <i>fsc</i> *] R <sup>2</sup> =34%; |
| Q12b    | <i>plantcontinue</i> | QS | “What were the main reasons that motivated you to maintain and continue planting acacias until today?”                                                                                                                   |
| Q12b1   | <i>plcincome</i>     | B  | A: “Because I have gained a good income from my acacia plantation.”                                                                                                                                                      |
|         | stated by 98         |    | BLR [- <i>districtPL</i> *, - <i>ethnmin</i> ***, + <i>education</i> *] R <sup>2</sup> =11%                                                                                                                              |
| Q12b2   | <i>plclowcost</i>    | B  | A: “Investments (cost, labor) for planting and maintaining plantations are low.”                                                                                                                                         |
|         | stated by 17         |    | Chisq [+ <i>genderW</i> ***]                                                                                                                                                                                             |
| Q12b3   | <i>plceasymanage</i> | B  | A: “The plantations are easy to manage with simple techniques.”                                                                                                                                                          |
|         | stated by 32         |    | Chisq [ <i>district</i> ***]                                                                                                                                                                                             |
| Q12b4   | <i>plcconvenient</i> | B  | Answers Q12b2 and Q12b3 combined. Costs and management convenience.                                                                                                                                                      |
|         | stated by 49         |    | BLR [- <i>districtHT</i> *, + <i>ethnmin</i> ***, + <i>genderW</i> *] R <sup>2</sup> =11%                                                                                                                                |
| Q12b5   | <i>plcfastreturn</i> | B  | A: “The plantations provide a fast return for investments.”                                                                                                                                                              |
|         | stated by 17         |    | -                                                                                                                                                                                                                        |
| Q12b6   | <i>plcmarket</i>     | B  | A: “A market for selling the woods is closely available.”                                                                                                                                                                |
|         | stated by 16         |    | -                                                                                                                                                                                                                        |
| Q13a    | <i>plsupport</i>     | N  | “Did you receive any help from actors during establishing acacia plantation?”                                                                                                                                            |
| Q13a1   | <i>plsgovorg</i>     | B  | A: “Yes, from a governmental organisation (e.g. state forest company)”                                                                                                                                                   |
|         | stated by 124        |    | BLR [- <i>genderW</i> *, + <i>firsteucalypt</i> **, + <i>plantduration</i> ***, + <i>plrprogram</i> *] R <sup>2</sup> =29%                                                                                               |

**Table S3.** Summary of Part 2 variables (History and involvement in plantation forestry) continued. For descriptions of table content and summary statistics refer to Table S1.

| QQ No                                                                     | Variable name               | Data type | Questionnaire question / information                                                                                                                                    |
|---------------------------------------------------------------------------|-----------------------------|-----------|-------------------------------------------------------------------------------------------------------------------------------------------------------------------------|
| transf.                                                                   | Summary statistics          |           | Statistical test and predictor variables                                                                                                                                |
| <b>Part 2: History and involvement in plantation forestry [continued]</b> |                             |           |                                                                                                                                                                         |
| Q13a2                                                                     | <i>plngo</i>                | B         | A: “Yes, from a non-governmental organisation”                                                                                                                          |
|                                                                           | stated by 27                |           | (26 in PL, one in HT) analysis for PL only:<br>BLR [+ <i>districtPL</i> ***, + <i>education</i> ***, + <i>honorary</i> *, + <i>firsteucalypt</i> *] R <sup>2</sup> =54% |
| Q13a3                                                                     | <i>plsother</i>             | B         | A: “Yes, from other actors [unspecified]”                                                                                                                               |
|                                                                           | stated by 6                 |           | -                                                                                                                                                                       |
| Q13a4                                                                     | <i>plsnone</i>              | B         | Answer was “No, I did not receive any help from any organisation or actors”, or no specific answer was given.                                                           |
|                                                                           | A: ‘no’ (14), no info? (36) |           | BLR [- <i>plantduration</i> ***] R <sup>2</sup> =26%                                                                                                                    |

|             |                                                           |    |                                                                                                                                                                                                                                                                                                                                                                          |
|-------------|-----------------------------------------------------------|----|--------------------------------------------------------------------------------------------------------------------------------------------------------------------------------------------------------------------------------------------------------------------------------------------------------------------------------------------------------------------------|
| <b>Q13b</b> | <i>plspprogram</i>                                        | N  | “Did a specific program (led by a governmental organization or an NGO) support you to set up acacia plantations? Please list.”                                                                                                                                                                                                                                           |
| Q13b1       | <i>plspPam4303</i>                                        | B  | A: “Yes, the program Pam4303.”                                                                                                                                                                                                                                                                                                                                           |
|             | mentioned by 59                                           |    | BLR [ <i>+plantduration***</i> , <i>+plsgovorg***</i> , <i>+plsnego***</i> ] $R^2=37\%$                                                                                                                                                                                                                                                                                  |
| Q13b2       | <i>plspPr327</i>                                          | B  | A: “Yes, the Program 337 (Greening the Barren Hills Program).”                                                                                                                                                                                                                                                                                                           |
|             | mentioned by 24                                           |    | BLR [ <i>+districtPL***</i> , <i>+education*</i> , <i>+plantduration**</i> ] $R^2=41\%$                                                                                                                                                                                                                                                                                  |
| Q13b3       | <i>plspPr661</i>                                          | B  | A: “Yes, the Program 661 (Five Million Hectares Reforestation Program).”                                                                                                                                                                                                                                                                                                 |
|             | mentioned by 18                                           |    | Chisq [ <i>district***</i> ], in <i>districtPL</i> : Chisq [ <i>-plrlearn**</i> ], Chisq [ <i>+plsgovorg*</i> ]                                                                                                                                                                                                                                                          |
| Q13b4       | <i>plspWB3</i>                                            | B  | A: “Yes, the Program WB3.”                                                                                                                                                                                                                                                                                                                                               |
|             | mentioned by 79                                           |    | Chisq [ <i>+plsgovorg***</i> ], [ <i>-districtAL***</i> ]; MLR# [ <i>-districtPL*</i> , <i>-districtAL***</i> , <i>+education***</i> , <i>+genderW*</i> , <i>+plrlearn**</i> , <i>+plsgovorg***</i> ] $R^2=48\%$                                                                                                                                                         |
| Q13b5       | <i>plspWWF</i>                                            | B  | A: “Yes, programs conducted by WWF (World Wildlife Fund).”                                                                                                                                                                                                                                                                                                               |
|             | mentioned by 45                                           |    | Chisq [ <i>+plsgovorg***</i> ], [ <i>-districtAL***</i> ]; MLR# [ <i>+districtPL*</i> , <i>+education***</i> , <i>+firsteucalypt*</i> , <i>+firstrubber*</i> , <i>+plsgovorg**</i> ] $R^2=31\%$                                                                                                                                                                          |
| Q13b6       | <i>plspFSC</i>                                            | B  | A: “Yes, programs conducted by FSC (Forest Stewardship Council).”                                                                                                                                                                                                                                                                                                        |
|             | mentioned by 22                                           |    | Chisq [ <i>-districtAL*</i> ]; BLR [ <i>+education***</i> , <i>+plantduration*</i> , <i>+firsteucalypt*</i> ] $R^2=22\%$                                                                                                                                                                                                                                                 |
| Q13b7       | <i>plspnone</i>                                           | B  | A: “No, no program supported me.” (or no answers provided in that respect)                                                                                                                                                                                                                                                                                               |
|             | noted for 77 respondents                                  |    | BLR [ <i>+districtAL***</i> , <i>-education**</i> , <i>-plsgovorg***</i> ] $R^2=63\%$                                                                                                                                                                                                                                                                                    |
| Q13b8       | <i>plspcount</i>                                          | O  | The number of programs (Q13b1-Q13b6) mentioned by any respondent.                                                                                                                                                                                                                                                                                                        |
|             | 0 (77), 1 (27),<br>2 (39), 3 (23),<br>4 (1), 5 (9), 6 (4) |    | OLR [ <i>+districtPL***</i> , <i>+districtHT*</i> , <i>+education***</i> , <i>+plantduration***</i> , <i>+plsgovorg***</i> ] $R^2\approx 62\%$ ; GLM# [ <i>-districtAL***</i> , <i>+sawlog***</i> , <i>+fsc(sawlog)***</i> , <i>district×fsc(sawlog)***</i> , <i>+fscexploit(fsc)*</i> , <i>+education*</i> , <i>+plantduration*</i> , <i>+plsgovorg***</i> ] $R^2=75\%$ |
| <b>Q13c</b> | <i>plsupporttype</i>                                      | QS | “What type of support did you receive from any of those actors (government organisations, NGOs, or other) and/or programs?”                                                                                                                                                                                                                                              |
| Q13c1       | <i>plstloan</i>                                           | B  | A: “I received a loan.”                                                                                                                                                                                                                                                                                                                                                  |
|             | stated by 89                                              |    | BLR [ <i>-districtPL***</i> , <i>+districtAL***</i> , <i>+plantduration***</i> , <i>+plspWB3***</i> ] $R^2=59\%$<br>Of those 137 (see <i>plneedloan</i> ) who took a loan: Chisq [ <i>+plsgovorg***</i> ], [ <i>+plspWB3***</i> ]; BLR [ <i>+districtAL***</i> , <i>+plspWB3***</i> ] $R^2=55\%$                                                                         |
| Q13c2       | <i>plstseedlings</i>                                      | B  | A: “I received tree seedlings from a tree nursery.”                                                                                                                                                                                                                                                                                                                      |
|             | stated by 73                                              |    | Chisq [ <i>+plsgovorg***</i> ]; Chisq [ <i>+plsnego***</i> ]; BLR [ <i>+districtAL*</i> , <i>-genderW*</i> , <i>+plantduration**</i> , <i>+plspPam4303*</i> , <i>+plspPr327***</i> , <i>+plspWWF***</i> ] $R^2=49\%$ ;<br>BLR [ <i>+plspPam4303***</i> , <i>+plspPr327***</i> , <i>+plspWWF***</i> , <i>+plspFSC**</i> ] $R^2=48\%$                                      |
| Q13c3       | <i>plstfertilizer</i>                                     | B  | A: “I received fertilizer to support tree growth on plantations.”                                                                                                                                                                                                                                                                                                        |
|             | stated by 32                                              |    | Chisq [ <i>+plsgovorg***</i> ]; Chisq [ <i>+plspWWF***</i> ];<br>BLR [ <i>+districtHT**</i> , <i>+plspWWF***</i> ] $R^2=65\%$                                                                                                                                                                                                                                            |
| Q13c4       | <i>plsttraining</i>                                       | B  | A: “I received training in plantation management (or other things).”                                                                                                                                                                                                                                                                                                     |
|             | stated by 63                                              |    | Chisq [ <i>+plspWB3***</i> ]; Chisq [ <i>+plspWWF***</i> ]; Chisq [ <i>+plspFSC***</i> ];<br>MLR# [ <i>+districtPL*</i> , <i>+districtAL*</i> , <i>+plspWB3***</i> , <i>+plspWWF***</i> , <i>+plspFSC***</i> ] $R^2=79\%$ ; BLR [ <i>+age*</i> , <i>-plantduration*</i> , <i>+plspcount***</i> ] $R^2=55\%$                                                              |

**Table S4.** Summary of Part 2 variables (History and involvement in plantation forestry) continued. For descriptions of table content and summary statistics refer to Table S1.

| QQ No                                                              | Variable name                                                              | Data type                                                                                                                                                                                                                                                                                                                                                                                                                                          | Questionnaire question / information                                                                                                                                                     |
|--------------------------------------------------------------------|----------------------------------------------------------------------------|----------------------------------------------------------------------------------------------------------------------------------------------------------------------------------------------------------------------------------------------------------------------------------------------------------------------------------------------------------------------------------------------------------------------------------------------------|------------------------------------------------------------------------------------------------------------------------------------------------------------------------------------------|
| transf.                                                            | Summary statistics                                                         |                                                                                                                                                                                                                                                                                                                                                                                                                                                    | Statistical test and predictor variables                                                                                                                                                 |
| Part 2: History and involvement in plantation forestry [continued] |                                                                            |                                                                                                                                                                                                                                                                                                                                                                                                                                                    |                                                                                                                                                                                          |
| Q13c5                                                              | <i>plstselling</i>                                                         | B                                                                                                                                                                                                                                                                                                                                                                                                                                                  | A: “I received support to sell my plantation products.”                                                                                                                                  |
|                                                                    | stated by 56                                                               |                                                                                                                                                                                                                                                                                                                                                                                                                                                    | Chisq [ <i>+plspWWF***</i> ]; Chisq [ <i>+plspWB3***</i> ]; Chisq [ <i>+plspPr327**</i> ]; BLR [ <i>-districtPL***</i> , <i>+education**</i> , <i>+plscount***</i> ] R <sup>2</sup> =72% |
| Q13c6                                                              | <i>plstcertify</i>                                                         | B                                                                                                                                                                                                                                                                                                                                                                                                                                                  | A: “I received support for the certification of my plantation products.”                                                                                                                 |
|                                                                    | stated by 52                                                               |                                                                                                                                                                                                                                                                                                                                                                                                                                                    | BLR [ <i>+plspPam4303***</i> , <i>+plspWB3***</i> , <i>+plspFSC***</i> ] R <sup>2</sup> =71%<br>BLR [ <i>+plrlearn*</i> , <i>+plspcount***</i> ] R <sup>2</sup> =53%                     |
| Q13c7                                                              | <i>plstdisprob</i>                                                         | B                                                                                                                                                                                                                                                                                                                                                                                                                                                  | A: “Forest rangers come to check the cause of plant disease (death of trees).”                                                                                                           |
|                                                                    | stated by 13                                                               |                                                                                                                                                                                                                                                                                                                                                                                                                                                    | -                                                                                                                                                                                        |
| Q13c8                                                              | <i>plstother</i>                                                           | B                                                                                                                                                                                                                                                                                                                                                                                                                                                  | A: “I received other types of support.”                                                                                                                                                  |
|                                                                    | stated by 1                                                                |                                                                                                                                                                                                                                                                                                                                                                                                                                                    | -                                                                                                                                                                                        |
| Q13c9                                                              | <i>plstnoinfo</i>                                                          | B                                                                                                                                                                                                                                                                                                                                                                                                                                                  | Did not receive specific support or no information was provided.                                                                                                                         |
|                                                                    | noted for 66                                                               | BLR [ <i>-plsgovorg***</i> , <i>-plspWB3***</i> ] R <sup>2</sup> =70%; [ <i>-plantduration***</i> , <i>-education*</i> ] R <sup>2</sup> =17%                                                                                                                                                                                                                                                                                                       |                                                                                                                                                                                          |
| Q13c10                                                             | <i>plstcount</i>                                                           | O                                                                                                                                                                                                                                                                                                                                                                                                                                                  | The number of support items (Q13c1-Q13c7) mentioned by any respondent.                                                                                                                   |
|                                                                    | 0 (66), 1 (41), 2 (15), 3 (6), 4 (2), 5 (18), 6 (32)                       | MLR [ <i>+plspgovorg***</i> , <i>+plspWB3***</i> , <i>+plspWWF***</i> ] R <sup>2</sup> =84%;<br>MLR [ <i>-genderW*</i> , <i>-plrlearn***</i> , <i>+plspWB3***</i> , <i>+plspWWF***</i> , <i>+plspFSC***</i> , <i>+plspcount***</i> ] R <sup>2</sup> =84%; GLM <sup>#</sup> [ <i>district***</i> , <i>+fsc***</i> , <i>district×fsc***</i> ] R <sup>2</sup> =56%                                                                                    |                                                                                                                                                                                          |
| Q14                                                                | <i>plneedloan</i>                                                          | B                                                                                                                                                                                                                                                                                                                                                                                                                                                  | “Did you need to take up a loan in order to establish the plantation?” A: Y/N                                                                                                            |
|                                                                    | yes (137), no (43)                                                         | BLR [ <i>+ethnmin***</i> , <i>-education**</i> , <i>+plantduration***</i> , <i>-firstrubber**</i> ] R <sup>2</sup> =31%;<br>BLR [ <i>+genderW*</i> , <i>+ethnmin***</i> , <i>-education*</i> , <i>+plantduration***</i> , <i>-firstrubber**</i> , <i>+plspWB3***</i> , <i>+plspnone**</i> , <i>+plspPr327*</i> , <i>-plsnego*</i> ] R <sup>2</sup> =40%                                                                                            |                                                                                                                                                                                          |
| Q15a                                                               | <i>plestlandcov</i>                                                        | N                                                                                                                                                                                                                                                                                                                                                                                                                                                  | “What types of land did you use to establishing your first plantations?”                                                                                                                 |
|                                                                    | bushland (135), agricultural land (24), bare land (6), natural forest (15) | <i>plestlandbush</i> : BLR [ <i>+districtHT***</i> , <i>+firsteucalypt*</i> , <i>-plantduration*</i> , <i>+plspcount**</i> ] R <sup>2</sup> =15%; BLR [ <i>+districtHT***</i> , <i>+plottreven*</i> ] R <sup>2</sup> =14%;<br><i>plestlandagri</i> : BLR [ <i>+districtPL***</i> , <i>-plottreven*</i> ] R <sup>2</sup> =15%; <i>plestlandforest</i> : Chisq [ <i>+districtAL***</i> ]; in A Luoi: BLR [ <i>-education**</i> ] R <sup>2</sup> =16% |                                                                                                                                                                                          |
| Q15b                                                               | <i>plestlandlive</i>                                                       | O                                                                                                                                                                                                                                                                                                                                                                                                                                                  | “Were these lands used to support your livelihoods? If yes, to what degree?”                                                                                                             |
|                                                                    | no (113), minor (55), moderate, (10), significant support (2)              | OLR [ <i>+plottreven*</i> , <i>+plestlandagri***</i> , <i>+plestlandforest***</i> ] R <sup>2</sup> ≈38%                                                                                                                                                                                                                                                                                                                                            |                                                                                                                                                                                          |
| Q15d                                                               | <i>plestlandprod</i>                                                       | N                                                                                                                                                                                                                                                                                                                                                                                                                                                  | “What were the main products you obtained from those lands?”                                                                                                                             |
| Q15d1                                                              | <i>plestlandwood</i>                                                       | B                                                                                                                                                                                                                                                                                                                                                                                                                                                  | A: wood                                                                                                                                                                                  |
|                                                                    | noted by 20                                                                |                                                                                                                                                                                                                                                                                                                                                                                                                                                    | Chisq [ <i>+plestlandlive(y/n)***</i> ], [ <i>+plestlandbush**</i> ], [ <i>+plestlandforest***</i> ]                                                                                     |
| Q15d2                                                              | <i>plestlafirewood</i>                                                     | B                                                                                                                                                                                                                                                                                                                                                                                                                                                  | A: firewood                                                                                                                                                                              |
|                                                                    | noted by 42                                                                |                                                                                                                                                                                                                                                                                                                                                                                                                                                    | Chisq [ <i>+plestlandlive(y/n)***</i> ], [ <i>+plestlandbush***</i> ], [ <i>+plestlandforest**</i> ]                                                                                     |
| Q15d3                                                              | <i>plestlandfood</i>                                                       | B                                                                                                                                                                                                                                                                                                                                                                                                                                                  | A: food products                                                                                                                                                                         |
|                                                                    | noted by 35                                                                |                                                                                                                                                                                                                                                                                                                                                                                                                                                    | Chisq [ <i>+plestlandlive(y/n)***</i> ], [ <i>+plestlandagri***</i> ], [ <i>+plestlandforest**</i> ]                                                                                     |

|       |                                                   |        |                                                                                 |
|-------|---------------------------------------------------|--------|---------------------------------------------------------------------------------|
| Q16a1 | buyplantation                                     | B      | “In addition to your original plots, have you bought any plantations?” A: Y/N   |
|       | yes (19), no/no info (161)                        |        | Chisq [ <i>district*</i> ]                                                      |
| Q16a2 | buyplarea                                         | CI > s | “What was the area (in hectares) of the plantations which you bought?”          |
|       | 5.5 ± 4.9 (19; 1-19.5)                            |        | MLR [ <i>-age*</i> , <i>+plsngo**</i> , <i>+plspWWF**</i> ] R <sup>2</sup> =24% |
| Q16a3 | buyplyear1st                                      | DI > s | “In which year did you buy the plantation plots?” > first year                  |
|       | 5.6 ± 4.3 (19; 3-18)                              |        | -                                                                               |
| Q16b1 | sellplantation                                    | B      | “Have you sold any plantation which you have owned?” A: Y/N                     |
|       | yes, acacia (8), yes, rubber (2), no/no info(170) |        | Chisq [ <i>+districtHT*</i> ]                                                   |
| Q16b2 | sellplarea                                        | CI > s | “What was the area (in hectares) of the plantations which you sold?”            |
|       | 1.7 ± 0.8 (10; 1-3)                               |        | MLR [ <i>+districtHT*</i> , <i>+plsnone*</i> ] R <sup>2</sup> =5%               |
| Q16b3 | sellplyear1st                                     | DI > s | “In which year did you sell the plantation plots?” > first year                 |
|       | 7.2 ± 4.7 (10; 3-18)                              |        | -                                                                               |

**Table S5.** Summary of Part 3 variables (Plantation assets during the survey [year 2018]). For descriptions of table content and summary statistics refer to Table S1.

| QQ No                                                   | Variable name                | Data type                                                                                                                                                                                                                                                                                                                                                                                                                                                                                                                                                                                                                                                                                                                                                                                                                                                                                                                                                                       | Questionnaire question / information                                            |
|---------------------------------------------------------|------------------------------|---------------------------------------------------------------------------------------------------------------------------------------------------------------------------------------------------------------------------------------------------------------------------------------------------------------------------------------------------------------------------------------------------------------------------------------------------------------------------------------------------------------------------------------------------------------------------------------------------------------------------------------------------------------------------------------------------------------------------------------------------------------------------------------------------------------------------------------------------------------------------------------------------------------------------------------------------------------------------------|---------------------------------------------------------------------------------|
| transf.                                                 | Summary statistics           |                                                                                                                                                                                                                                                                                                                                                                                                                                                                                                                                                                                                                                                                                                                                                                                                                                                                                                                                                                                 | Statistical test and predictor variables                                        |
| Part 3: Plantation assets during the survey (year 2018) |                              |                                                                                                                                                                                                                                                                                                                                                                                                                                                                                                                                                                                                                                                                                                                                                                                                                                                                                                                                                                                 |                                                                                 |
| Q17a                                                    | plotscultivated              | CI                                                                                                                                                                                                                                                                                                                                                                                                                                                                                                                                                                                                                                                                                                                                                                                                                                                                                                                                                                              | “Please list size (ha) for each acacia plot under your cultivation management.” |
| Q17a1                                                   | plotnumber                   | DI >ln                                                                                                                                                                                                                                                                                                                                                                                                                                                                                                                                                                                                                                                                                                                                                                                                                                                                                                                                                                          | number of acacia plots under cultivation (owned or rented)                      |
|                                                         | 2.4 ± 1.3 (1-6)              | MLR [ <i>+plspcount***</i> , <i>+buyplarea**</i> ] R <sup>2</sup> =37%; MLR [ <i>+plspWB3***</i> , <i>+plspWWF***</i> , <i>+buyplarea**</i> ] R <sup>2</sup> =45%; GLM [ <i>+sawlog***</i> , <i>-districtAL×fsc(sawlog)**</i> , <i>+fscexploit(fsc)**</i> , <i>+plsWB3***</i> , <i>+buyplarea*</i> ] R <sup>2</sup> =58%; GLM [ <i>+sawlog***</i> , <i>+fsc(sawlog)*</i> , <i>-districtAL×fsc(sawlog)***</i> , <i>+fscexploit(fsc)***</i> , <i>-plottrevenmild*</i> ] R <sup>2</sup> =58%                                                                                                                                                                                                                                                                                                                                                                                                                                                                                       |                                                                                 |
| Q17a2                                                   | plotareatot                  | CI >ln                                                                                                                                                                                                                                                                                                                                                                                                                                                                                                                                                                                                                                                                                                                                                                                                                                                                                                                                                                          | total area (hectares) of acacia plots under cultivation (owned or rented)       |
|                                                         | 5.8 ± 7.1<br>(0.4-46.0)      | MLR [ <i>+education*</i> , <i>+plrprogram**</i> , <i>+plsngo*</i> , <i>+plspcount***</i> , <i>+buyplarea***</i> ] R <sup>2</sup> =45%; GLM [ <i>+sawlog***</i> , <i>-districtAL×fsc(sawlog)*</i> , <i>+fscexploit(fsc)**</i> , <i>+plspcount*</i> , <i>+buyplarea***</i> , <i>-plottrevenmild*</i> ] R <sup>2</sup> =63%; GLM [ <i>+sawlog***</i> , <i>+fsc(sawlog)**</i> , <i>-districtAL×fsc(sawlog)**</i> , <i>+fscexploit(fsc)***</i> ] R <sup>2</sup> =58%; analysing <i>nF/woodchip</i> producers only: GLM [ <i>+plrprogram*</i> , <i>+plotrubber*</i> ] R <sup>2</sup> =24%; analysing <i>sawlog(1)</i> only: GLM [ <i>+education*</i> , <i>+plspcount***</i> , <i>-plspPr327**</i> , <i>+buyplarea***</i> ] R <sup>2</sup> =51%; analysing <i>fsc(1)</i> only: GLM [ <i>+plspcount***</i> , <i>-plspPr327*</i> , <i>+buyplarea***</i> ] R <sup>2</sup> =50%; analysing <i>fscexploit(1)</i> only: GLM [ <i>+districtPL*</i> , <i>+buyplarea*</i> ] R <sup>2</sup> =40% |                                                                                 |
| Q17a3                                                   | plotsizemean                 | CI >ln                                                                                                                                                                                                                                                                                                                                                                                                                                                                                                                                                                                                                                                                                                                                                                                                                                                                                                                                                                          | average size (hectares) of acacia plots under cultivation (owned or rented)     |
|                                                         | 2.1 ± 1.5<br>(0.4-9.7)       | GLM [ <i>+sawlog***</i> , <i>-districtHT×sawlog*</i> , <i>+education*</i> , <i>+buyplarea**</i> ] R <sup>2</sup> =63%; GLM [ <i>+sawlog***</i> , <i>+fsc(sawlog)**</i> , <i>+fscexploit(fsc)*</i> ] R <sup>2</sup> =30%                                                                                                                                                                                                                                                                                                                                                                                                                                                                                                                                                                                                                                                                                                                                                         |                                                                                 |
| Q17a4                                                   | plotsizemax                  | CI                                                                                                                                                                                                                                                                                                                                                                                                                                                                                                                                                                                                                                                                                                                                                                                                                                                                                                                                                                              | maximal size (hectares) of acacia plots under cultivation (owned or rented)     |
|                                                         | 2.9 ± 2.6 (0.4-16)           | -                                                                                                                                                                                                                                                                                                                                                                                                                                                                                                                                                                                                                                                                                                                                                                                                                                                                                                                                                                               |                                                                                 |
| Q17a5                                                   | plotsize                     | CI >ln                                                                                                                                                                                                                                                                                                                                                                                                                                                                                                                                                                                                                                                                                                                                                                                                                                                                                                                                                                          | size (hectares) of acacia plots (plot data) under cultivation (owned or rented) |
|                                                         | 2.5 ± 2.2<br>(0.3-16; N=423) | GLM [ <i>+sawlog***</i> , <i>+fsc(sawlog)***</i> , <i>+fscexploit(fsc)*</i> , <i>+plotcoown(sawlog.fsc)*</i> ,                                                                                                                                                                                                                                                                                                                                                                                                                                                                                                                                                                                                                                                                                                                                                                                                                                                                  |                                                                                 |



|             |                                        |         |                                                                                                                                                                                                                                                                                                                                                                   |
|-------------|----------------------------------------|---------|-------------------------------------------------------------------------------------------------------------------------------------------------------------------------------------------------------------------------------------------------------------------------------------------------------------------------------------------------------------------|
|             |                                        |         | <i>-plotfsc(sawlog,fsc,plotsawlog)***, +plotdistance***</i> R <sup>2</sup> =27% ( <i>plotfsc</i> is whether (1) or not (0) plot was FSC-certified; <i>plotsawlog</i> is whether (1) or not (0) plot was stocked with sawlog; <i>plotcoown</i> is whether (1) or not (0) plot was co-owned); ANOVA [ <i>+plotterrain</i> ]*                                        |
| <b>Q17b</b> | <i>plotownership</i>                   | N       | “Q17a > indicate whether you own, rented, or collaboratively worked the plot.”                                                                                                                                                                                                                                                                                    |
| Q17b1       | <i>plotowned%</i>                      | CI > s  | plantation area percentage which is owned by the respondent                                                                                                                                                                                                                                                                                                       |
|             | 96.9 ± 11.0 (22.2-100)                 |         | - (165 owned all plots; cf. Q17b3)                                                                                                                                                                                                                                                                                                                                |
| Q17b1_1     | <i>plotareaown</i>                     | CI > ln | total area (hectares) of owned acacia plots                                                                                                                                                                                                                                                                                                                       |
|             | 5.3 ± 5.7 (0.4-31.0)                   |         | - (cf. Q17a2)                                                                                                                                                                                                                                                                                                                                                     |
| Q17b2       | <i>plotrented%</i>                     |         | respondent with rented plots (Y/N); if Y, plantation area percentage rented                                                                                                                                                                                                                                                                                       |
|             | yes (1); 50% (excl. “0”)               |         | -                                                                                                                                                                                                                                                                                                                                                                 |
| Q17b3       | <i>plotcollabor%</i>                   | CI > s  | respondent cultivating plot with others (Y/N); if Y, area percentage worked                                                                                                                                                                                                                                                                                       |
|             | yes (14); 36 ± 15.5 (22-78; excl. “0”) |         | only HT and PL districts, and only FSC:<br>MLR <sup>#</sup> [ <i>-plneedloan*</i> , <i>+plotareatot***</i> ] R <sup>2</sup> =25%                                                                                                                                                                                                                                  |
| <b>Q17c</b> | <i>plotacaciatype</i>                  | N       | “Q17a > please indicate the type of acacia which you planted on the plot.”                                                                                                                                                                                                                                                                                        |
| Q17c1       | <i>plotahybrid</i>                     | B (CI)  | acacia hybrids Y/N; percentage of cultivated area planted with acacia hybrids                                                                                                                                                                                                                                                                                     |
|             | yes (155);<br>82.4 ± 35.7 (0-100)      |         | Chisq [ <i>-districtAL***</i> ]; KW [ <i>-fsc*</i> , [ <i>-districtAL***</i> ]; GLM <sup>#</sup> [ <i>-districtAL***</i> ,<br><i>-sawlog**</i> , <i>-districtAL×sawlog***</i> ] R <sup>2</sup> =76%; GLM <sup>#</sup> [ <i>-districtAL***</i> ,<br><i>-plotchiptimb***</i> , <i>-plsp661**</i> , <i>-plstloan*</i> , <i>+plstseedlings*</i> ] R <sup>2</sup> =76% |
| Q17c2       | <i>plotamangium</i>                    | B (CI)  | <i>Acacia mangium</i> Y/N; percentage of cultivated area planted with <i>A. mangium</i>                                                                                                                                                                                                                                                                           |
|             | yes (45);<br>17.6 ± 35.7 (0-100)       |         | BLR [ <i>+districtAL***</i> , <i>+plotnumber***</i> , <i>+plotchiptimb**</i> , <i>+plspPr661**</i> , <i>+plstloan*</i> , <i>-plstseedlings*</i> ] R <sup>2</sup> =59%; BLR [ <i>+districtAL***</i> , <i>+fsc*</i> , <i>+plspPr661*</i> , <i>+plotnumber*</i> ] R <sup>2</sup> =55%                                                                                |
| <b>Q17d</b> | <i>plotproduct</i>                     | N       | “Q17a > indicate the type(s) of product(s) which you produce from the plot.”                                                                                                                                                                                                                                                                                      |
| Q17d1       | <i>plotwoodchip</i>                    | CI      | woodchip only Y/N; percentage of plot area cultivated only for woodchip                                                                                                                                                                                                                                                                                           |
|             | yes (142); 59.7 ± 39.0 (0-100)         |         | - (cf. Q17c2)                                                                                                                                                                                                                                                                                                                                                     |

**Table S6.** Summary of Part 3 variables (Plantation assets during the survey [year 2018]) continued. For descriptions of table content and summary statistics refer to Table S1.

| Part 3: Plantation assets during the survey (year 2018) [continued] |                                |        |                                                                                                                                                                                                                                                                                                                                                                                                                                                                                                                                                                                                                                                                                                                                                                                                                                                                                                                                                                                                                                                                                                                                |
|---------------------------------------------------------------------|--------------------------------|--------|--------------------------------------------------------------------------------------------------------------------------------------------------------------------------------------------------------------------------------------------------------------------------------------------------------------------------------------------------------------------------------------------------------------------------------------------------------------------------------------------------------------------------------------------------------------------------------------------------------------------------------------------------------------------------------------------------------------------------------------------------------------------------------------------------------------------------------------------------------------------------------------------------------------------------------------------------------------------------------------------------------------------------------------------------------------------------------------------------------------------------------|
| Q17d2                                                               | <i>plotchiptimb</i>            | CI ~n  | woodchip and timber Y/N; % of plot area cultivated for woodchip and timber                                                                                                                                                                                                                                                                                                                                                                                                                                                                                                                                                                                                                                                                                                                                                                                                                                                                                                                                                                                                                                                     |
|                                                                     | yes (111); 40.3 ± 39.0 (0-100) |        | <b>excluding sawlog as predictor:</b> GLM [ <i>+fsc***</i> , <i>-districtHT*</i> , <i>+districtAL×fsc***</i> , <i>-genderW*</i> , <i>+honorary***</i> , <i>-plsngo*</i> ] R <sup>2</sup> =52%; <b>excluding sawlog and fsc as predictor:</b> MLR [ <i>-genderW*</i> , <i>+education*</i> , <i>+honorary**</i> , <i>-plantduration*</i> , <i>+plrprogram*</i> , <i>+plotareatot***</i> ] R <sup>2</sup> =31%; MLR [ <i>+education*</i> , <i>+honorary***</i> , <i>-plsngo*</i> , <i>+plotareatot***</i> ] R <sup>2</sup> =29%; MLR [ <i>-genderW*</i> , <i>+education*</i> , <i>+honorary***</i> , <i>-plsngo**</i> , <i>+plotareatot***</i> , <i>-plspWB3**</i> , <i>+plstselling*</i> ] R <sup>2</sup> =31%; <b>analysis of sawlog(1) only:</b> MLR [ <i>+fsc*</i> , <i>-genderW*</i> , <i>+honorary***</i> , <i>-plantduration*</i> , <i>-plsngo*</i> , <i>-plspWB3**</i> , <i>+plspcount*</i> , <i>+plottrevenmild*</i> ] R <sup>2</sup> =29%; MLR [ <i>+fsc*</i> , <i>+honorary***</i> , <i>-plsngo*</i> , <i>-plspWB3**</i> , <i>+plottrevenmild*</i> , <i>-plneedloan*</i> , <i>+plsttraining*</i> ] R <sup>2</sup> =31% |
| <b>Q17e</b>                                                         | <i>plotdist</i>                | CI     | “Q17a > indicate the distance (in km) of the plot to your home”                                                                                                                                                                                                                                                                                                                                                                                                                                                                                                                                                                                                                                                                                                                                                                                                                                                                                                                                                                                                                                                                |
| Q17e1                                                               | <i>plotdistmean</i>            | CI > j | average distance (in km) from home to all the plots                                                                                                                                                                                                                                                                                                                                                                                                                                                                                                                                                                                                                                                                                                                                                                                                                                                                                                                                                                                                                                                                            |

|       |                                  |         |                                                                                                                                                                                                                                                                                                                                                                                                                                 |
|-------|----------------------------------|---------|---------------------------------------------------------------------------------------------------------------------------------------------------------------------------------------------------------------------------------------------------------------------------------------------------------------------------------------------------------------------------------------------------------------------------------|
|       | 3.2 ± 2.1 (0.01-12.3)            |         | GLM [ <i>+fscexploit*</i> , <i>-age*</i> , <i>+plsgovorg**</i> , <i>+plotareatot***</i> , <i>-plottrevenmild**</i> , <i>+plotsteepslope*</i> ] R <sup>2</sup> =35%; GLM [ <i>+sawlog**</i> , <i>+fscexploit*</i> ] R <sup>2</sup> =17%                                                                                                                                                                                          |
| Q17e2 | <i>plotdistmax</i>               | CI > b  | distance (in km) of the most distant plot to the home                                                                                                                                                                                                                                                                                                                                                                           |
|       | 5.1 ± 5.6<br>(0.01-30)           |         | GLM [ <i>+fscexploit*</i> , <i>-age*</i> , <i>+firsteucalypt*</i> , <i>+plsgovorg*</i> , <i>+plotnumber*</i> , <i>+plotsizemax***</i> , <i>+plotmedslope**</i> , <i>+plotsteepslope*</i> ] R <sup>2</sup> =51%; GLM [ <i>+sawlog***</i> , <i>+fscexploit***</i> ] R <sup>2</sup> =27%                                                                                                                                           |
| Q17e3 | <i>plotdistmin</i>               | CI > b  | distance (in km) from home to the nearest plot                                                                                                                                                                                                                                                                                                                                                                                  |
|       | 1.9 ± 1.5 (0.01-200)             |         | GLM [ <i>+fscexploit*</i> , <i>-genderW*</i> , <i>-age*</i> , <i>+plrprogram*</i> , <i>-plotnumber**</i> , <i>+plot-sizemax*</i> , <i>-plottreven**</i> , <i>-plotmildslope*</i> ] R <sup>2</sup> =22%; T-Test [ <i>+districtAL**</i> ]                                                                                                                                                                                         |
| Q17e4 | <i>plotdist</i>                  | CI > b  | distance (in km) from home to specific plots                                                                                                                                                                                                                                                                                                                                                                                    |
|       | 3.7 ± 4.1<br>(0.01-30;<br>N=423) |         | GLM [ <i>+sawlog***</i> , <i>+fsc(sawlog)***</i> , <i>+plotcoown(sawlog,fsc)***</i> , <i>-plotsawlog(sawlog)*</i> , <i>-plotfsc(sawlog,fsc,plotsawlog)**</i> ] R <sup>2</sup> =14% ( <i>plotfsc</i> is whether (1) or not (0) plot was FSC-certified; <i>plotsawlog</i> is whether (1) or not (0) plot was stocked with sawlog; <i>plotcoown</i> is whether (1) or not (0) plot was co-owned); ANOVA [ <i>+plotterrain***</i> ] |
| Q17f  | <i>plotterrain</i>               | O       | “Q17a > indicate the slope steepness of the plot”                                                                                                                                                                                                                                                                                                                                                                               |
| Q17f1 | <i>plottreven</i>                | CI > s  | percentage of plot area on relatively even terrain                                                                                                                                                                                                                                                                                                                                                                              |
|       | 12.1 ± 26.5 (47; 0-100)          |         | KW [ <i>-districtAL***</i> ]                                                                                                                                                                                                                                                                                                                                                                                                    |
| Q17f2 | <i>plotmildslope</i>             | CI > s  | percentage of plot area on mildly sloping terrain (~4°-10° steepness)                                                                                                                                                                                                                                                                                                                                                           |
|       | 44.8 ± 40.3 (121; 0-100)         |         | KW [ <i>-districtAL***</i> ]                                                                                                                                                                                                                                                                                                                                                                                                    |
| Q17f3 | <i>plotmedslope</i>              | CI > s  | percentage of plot area on medium sloping terrain (10°-30° steepness)                                                                                                                                                                                                                                                                                                                                                           |
|       | 40.6 ± 39.4 (109; 0-100)         |         | KW [ <i>+districtAL***</i> ]                                                                                                                                                                                                                                                                                                                                                                                                    |
| Q17f4 | <i>plotsteepslope</i>            | CI > s  | percentage of plot area on steeply sloping terrain (>30° steepness)                                                                                                                                                                                                                                                                                                                                                             |
|       | 2.5 ± 12.6 (8; 0-100)            |         | -                                                                                                                                                                                                                                                                                                                                                                                                                               |
| Q17f5 | <i>plottrevenmild</i>            | CI > b  | percentage of plot area on even or mildly sloping terrain (<10° steepness)                                                                                                                                                                                                                                                                                                                                                      |
|       | 56.9 ± 40.4 (140; 0-100)         |         | KW [ <i>-districtAL***</i> ]                                                                                                                                                                                                                                                                                                                                                                                                    |
| Q17g  | <i>plotharvest</i>               | CI      | “Q17a > for each plot indicate the time (years) until harvesting of the trees”                                                                                                                                                                                                                                                                                                                                                  |
| Q17g1 | <i>plotharvestmean</i>           | CI > ln | average time (years) from planting until acacia tree harvesting                                                                                                                                                                                                                                                                                                                                                                 |
|       | 5.5 ± 1.2 (3.5-8)                |         | -                                                                                                                                                                                                                                                                                                                                                                                                                               |
| Q17g2 | <i>plotharvestmax</i>            | CI > b  | maximum time (years) until acacia tree harvesting                                                                                                                                                                                                                                                                                                                                                                               |
|       | 6.1 ± 1.4 (3.5-8)                |         | GLM [ <i>+districtAL***</i> , <i>-districtHT***</i> , <i>+sawlog***</i> , <i>+fsc(sawlog)***</i> , <i>-genderW*</i> , <i>+age*</i> , <i>+education**</i> , <i>-plotnumber***</i> , <i>+plotdistmean*</i> ] R <sup>2</sup> =81%                                                                                                                                                                                                  |
| Q17g3 | <i>plotharvestmin</i>            | CI > b  | minimum time (years) from planting until acacia tree harvesting                                                                                                                                                                                                                                                                                                                                                                 |
|       | 4.9 ± 1.3 (3.5-8)                |         | -                                                                                                                                                                                                                                                                                                                                                                                                                               |
| Q17g4 | <i>plotharvestwgtl</i>           | CI > ln | time until harvesting weighted by plot area% (sum [time*area %] of all plots)                                                                                                                                                                                                                                                                                                                                                   |
|       | 5.3 ± 1.3 (1.4-8)                |         | GLM [ <i>+districtAL***</i> , <i>-districtHT***</i> , <i>+sawlog***</i> , <i>+plotFSC%***</i> ] R <sup>2</sup> =77%                                                                                                                                                                                                                                                                                                             |
| Q17g5 | <i>plotharvestsaw</i>            | CI > b  | average time of sawlog harvest on sawlog plots                                                                                                                                                                                                                                                                                                                                                                                  |
|       | 6.8 ± 0.8 (5-8)                  |         | GLM [ <i>+ethnmin***</i> , <i>+fsc***</i> ] R <sup>2</sup> =68%                                                                                                                                                                                                                                                                                                                                                                 |



**Table S7.** Summary of Part 3 variables (Plantation assets during the survey [year 2018]) continued, and summary of Part 4 variables (Management of acacia plantations [year 2018]). For descriptions of table content and summary statistics refer to Table S1.

| QQ No                                                               | Variable name                                                                                                                                                                  | Data type                                                                                                                                                                                                                                                                                                                                               | Questionnaire question / information                                                                                                                        |
|---------------------------------------------------------------------|--------------------------------------------------------------------------------------------------------------------------------------------------------------------------------|---------------------------------------------------------------------------------------------------------------------------------------------------------------------------------------------------------------------------------------------------------------------------------------------------------------------------------------------------------|-------------------------------------------------------------------------------------------------------------------------------------------------------------|
| transf.                                                             | Summary statistics                                                                                                                                                             | Statistical test and predictor variables                                                                                                                                                                                                                                                                                                                |                                                                                                                                                             |
| Part 3: Plantation assets during the survey (year 2018) [continued] |                                                                                                                                                                                |                                                                                                                                                                                                                                                                                                                                                         |                                                                                                                                                             |
| Q17g6                                                               | <i>plotharvestchip</i>                                                                                                                                                         | CI > b                                                                                                                                                                                                                                                                                                                                                  | time until harvesting weighted by plot area% (sum [time*area %] of all plots)                                                                               |
|                                                                     | 4.4 ± 0.5 (3.5-6)                                                                                                                                                              | GLM [ <i>+districtAL***, -genderW*, +plotnumber*, -plotchiptimb*</i> ] R <sup>2</sup> =77%                                                                                                                                                                                                                                                              |                                                                                                                                                             |
| Q17h                                                                | <i>plotburn%</i>                                                                                                                                                               | CI > s                                                                                                                                                                                                                                                                                                                                                  | percentage plot area which is usually burnt after harvesting                                                                                                |
|                                                                     | 43.2 ± 46.3<br>(92; 0-100)                                                                                                                                                     | GLM [ <i>+districtAL**, +age***, -plantduration*, -plotharvestmax*, -plotFSC%***, -fieldcassava*, -plrprogram*, -plsngo**, -plottrevenmild*</i> ] R <sup>2</sup> =45%;<br>GLM [ <i>+districtAL*, -sawlog***, -fsc(sawlog)***, -districtHT×sawlog*, -education**, -plantduration*, +plsgovorg**, -plottreven*, -plestlandlive*</i> ] R <sup>2</sup> =46% |                                                                                                                                                             |
| Q17j                                                                | <i>plotFSC%</i>                                                                                                                                                                | CI > s                                                                                                                                                                                                                                                                                                                                                  | percentage of plot area which is managed under an FSC certificate                                                                                           |
|                                                                     | 30.2 ± 38.2<br>(87; 0-100)                                                                                                                                                     | GLM [ <i>+districtAL*, +districtAL×sawlog***, -districtHT×sawlog*, +plstselling***, +plotchiptimb**, +plotharvestwtl***, -plotmedslope*</i> ] R <sup>2</sup> =75%; <b>analysis of fsc(1) only:</b> SLR [ <i>-districtPL**, +plotchiptimb***</i> ] R <sup>2</sup> =85%                                                                                   |                                                                                                                                                             |
| Q18                                                                 | <i>plotsothertree</i>                                                                                                                                                          | CI                                                                                                                                                                                                                                                                                                                                                      | “Please list size (ha) for other tree plots under your cultivation management.”                                                                             |
| Q18a                                                                | <i>plotrubber</i>                                                                                                                                                              | CI                                                                                                                                                                                                                                                                                                                                                      | area (hectares) of rubber plots cultivated by the respondent                                                                                                |
|                                                                     | 0.4 ± 1.1 (32; 0-6)                                                                                                                                                            | Not incl. <i>districtAL</i> : GLM [ <i>+districtHT*, +firstrubber***, +plspFSC***</i> ] R <sup>2</sup> =25%                                                                                                                                                                                                                                             |                                                                                                                                                             |
| Q18b                                                                | <i>plotcroptree</i>                                                                                                                                                            | CI                                                                                                                                                                                                                                                                                                                                                      | area (hectares) of other tree plots cultivated by the respondent                                                                                            |
|                                                                     | 0.01 ± 0.08 (6; 0-1); i.e. pepper ( <i>Piper nigra</i> , plots of 0.2 ha, 2 respondents), areca palm (0.1 ha), fruit trees (1 ha), banana trees (0.1 ha), coffee plot (0.2 ha) |                                                                                                                                                                                                                                                                                                                                                         |                                                                                                                                                             |
| Q19                                                                 | <i>fieldcrops</i>                                                                                                                                                              | CI                                                                                                                                                                                                                                                                                                                                                      | “Please list size (ha) for other crop fields under your cultivation management.”                                                                            |
| Q19a                                                                | <i>fieldcassava</i>                                                                                                                                                            | CI > s                                                                                                                                                                                                                                                                                                                                                  | area (hectares) of cassava fields cultivated by the respondent                                                                                              |
|                                                                     | 0.03 ± 0.12 (17; 0-1)                                                                                                                                                          | Only analysed for A Luoi (15 respondents; 2 in Phu Loc): GLM <sup>#</sup> [ <i>-education***, -plantduration***, +plotmedslope*, +fsc**, -plestlandforest*</i> ] R <sup>2</sup> =52%                                                                                                                                                                    |                                                                                                                                                             |
| Q19b                                                                | <i>fieldrice</i>                                                                                                                                                               | CI > s                                                                                                                                                                                                                                                                                                                                                  | area (hectares) of rice fields cultivated by the respondent                                                                                                 |
|                                                                     | 0.07 ± 0.12 (64; 0-0.5)                                                                                                                                                        | GLM [ <i>+districtAL***, +age*</i> ] R <sup>2</sup> =9%                                                                                                                                                                                                                                                                                                 |                                                                                                                                                             |
| Q19c                                                                | <i>fieldother</i>                                                                                                                                                              | CI                                                                                                                                                                                                                                                                                                                                                      | area (hectares) of other crop fields cultivated by the respondent                                                                                           |
|                                                                     | 0.01 ± 0.08 (4; 0-1); i.e. grapefruit (0.1 ha), lotus flower (1 ha), corn (0.1 ha), soybean (0.1 ha)                                                                           |                                                                                                                                                                                                                                                                                                                                                         |                                                                                                                                                             |
| Q20a                                                                | <i>plotsideincome</i>                                                                                                                                                          | N                                                                                                                                                                                                                                                                                                                                                       | “Did you gain a side income from your acacia plots? If yes, which one?”                                                                                     |
| Q20a1                                                               | <i>plotsidebees</i>                                                                                                                                                            | B                                                                                                                                                                                                                                                                                                                                                       | A: income from beekeeping (or rental for beekeepers)                                                                                                        |
|                                                                     | noted by 7                                                                                                                                                                     |                                                                                                                                                                                                                                                                                                                                                         | (6 in Phu Loc, 1 in Huong Tra)                                                                                                                              |
| Q20a2                                                               | <i>plotsidefirewd</i>                                                                                                                                                          | B                                                                                                                                                                                                                                                                                                                                                       | A: income from firewood collection (or allowance for firewood collection)                                                                                   |
|                                                                     | noted by 22                                                                                                                                                                    |                                                                                                                                                                                                                                                                                                                                                         | Not including data for A Luoi (only one respondent): GLM [ <i>+districtPL*, -sawlog**, -education*, -plantduration*, -plotnumber*</i> ] R <sup>2</sup> =46% |
| Q20b                                                                | <i>incomeotherag</i>                                                                                                                                                           | B                                                                                                                                                                                                                                                                                                                                                       | “Did you gain a side income from other plantations? If yes, which ones?”                                                                                    |
|                                                                     | yes (115), no (65)                                                                                                                                                             |                                                                                                                                                                                                                                                                                                                                                         | -                                                                                                                                                           |
| Q20b1                                                               | <i>incomemidmen</i>                                                                                                                                                            | B                                                                                                                                                                                                                                                                                                                                                       | A: income as a middleman (e.g. acacia wood trading)                                                                                                         |
|                                                                     | noted by 9                                                                                                                                                                     |                                                                                                                                                                                                                                                                                                                                                         | (5 in Phu Loc, 4 in Huong Tra; all <i>fsc</i> )                                                                                                             |

|                                                             |                        |      |                                                                                                                                   |
|-------------------------------------------------------------|------------------------|------|-----------------------------------------------------------------------------------------------------------------------------------|
| Q20b2                                                       | <i>incomewagearn</i>   | B    | A: income as a wage earner, or collaborator with others on their plot                                                             |
|                                                             | noted by 107           |      | BLR [ <i>+districtAL*</i> , <i>-sawlog*</i> , <i>-fsc**</i> , <i>-plrprogram**</i> , <i>-plsttraining**</i> ] R <sup>2</sup> =48% |
| Q20b3                                                       | <i>incomesawyer</i>    | B    | A: income as a sawyer                                                                                                             |
|                                                             | noted by 2             |      | (1 in Phu Loc, 1 Huong Tra)                                                                                                       |
| <b>Part 4: Management of acacia plantations (year 2018)</b> |                        |      |                                                                                                                                   |
| Q21                                                         | <i>pmintercropping</i> | QS   | “Do you apply intercropping for your acacia plantations? Please give details.”                                                    |
| Q21a                                                        | <i>pmintercropcass</i> | B    | A: cassava intercropping in the first years after harvesting (planted with acacia)                                                |
|                                                             | noted by 32            |      | BLR [ <i>+districtAL***</i> , <i>+districtPL*</i> , <i>-sawlog*</i> , <i>+fieldcassawa***</i> ] R <sup>2</sup> =29%               |
| Q22                                                         | <i>pmersioncont</i>    | QS/B | “Do you apply measures for erosion control during plantation management?”                                                         |
|                                                             | yes (97), no (83)      |      | BLR [ <i>-districtAL***</i> , <i>+fsc*</i> , <i>+ploharvestmax***</i> ] R <sup>2</sup> =35%                                       |

**Table S8.** Summary of Part 4 variables (Management of acacia plantations [year 2018]) continued. For descriptions of table content and summary statistics refer to Table S1.

| QQ No                                                            | Variable name         | Data type                                                                                                                                                                                                                                                                                                                                                                                                                                                       | Questionnaire question / information                                             |
|------------------------------------------------------------------|-----------------------|-----------------------------------------------------------------------------------------------------------------------------------------------------------------------------------------------------------------------------------------------------------------------------------------------------------------------------------------------------------------------------------------------------------------------------------------------------------------|----------------------------------------------------------------------------------|
| transf.                                                          | Summary statistics    | Statistical test and predictor variables                                                                                                                                                                                                                                                                                                                                                                                                                        |                                                                                  |
| Part 4: Management of acacia plantations (year 2018) [continued] |                       |                                                                                                                                                                                                                                                                                                                                                                                                                                                                 |                                                                                  |
| Q22a                                                             | <i>pmersionoburn</i>  | B                                                                                                                                                                                                                                                                                                                                                                                                                                                               | A: no burning after harvesting                                                   |
|                                                                  | noted by 89           | BLR [- <i>districtAL***</i> , + <i>sawlog*</i> , + <i>fsc***</i> ] R <sup>2</sup> =30%;<br>BLR [- <i>districtAL***</i> , + <i>education**</i> , + <i>plotareatot*</i> , + <i>plotharvestmax**</i> ] R <sup>2</sup> =37%;<br>BLR [- <i>districtAL***</i> , + <i>districtHT*</i> , - <i>plstloan*</i> , + <i>plstfertilizer***</i> , + <i>plestlandlive*</i> , - <i>plotsidefirewd**</i> , + <i>plotsizemax*</i> , + <i>plotharvestmax*</i> ] R <sup>2</sup> =52% |                                                                                  |
| Q22b                                                             | <i>pmersionYpl</i>    | B                                                                                                                                                                                                                                                                                                                                                                                                                                                               | A: Y-shaped planting                                                             |
|                                                                  | noted by 8            | -                                                                                                                                                                                                                                                                                                                                                                                                                                                               |                                                                                  |
| Q22c                                                             | <i>pmersionsafev</i>  | B                                                                                                                                                                                                                                                                                                                                                                                                                                                               | A: conserve/safeguard some natural vegetation                                    |
|                                                                  | noted by 55           | BLR [+ <i>fsc***</i> , - <i>plrlearn*</i> , + <i>plstfertilizer***</i> , + <i>plotdistmax***</i> ] R <sup>2</sup> =46%<br>BLR [+ <i>honorary*</i> , + <i>plstfertilizer***</i> , + <i>plotdistmax**</i> , + <i>pmthinning***</i> ] R <sup>2</sup> =48%                                                                                                                                                                                                          |                                                                                  |
| Q22d                                                             | <i>pmersionladd</i>   | B                                                                                                                                                                                                                                                                                                                                                                                                                                                               | A: design of a ‘ladder’ in the plantation                                        |
|                                                                  | noted by 3            | -                                                                                                                                                                                                                                                                                                                                                                                                                                                               |                                                                                  |
| Q22e                                                             | <i>pmersiontime</i>   | N                                                                                                                                                                                                                                                                                                                                                                                                                                                               | A: “I narrow the period of harvest to planting & plant in the early dry season.” |
|                                                                  | noted by 1            | -                                                                                                                                                                                                                                                                                                                                                                                                                                                               |                                                                                  |
| Q23a                                                             | <i>pmcontrcond</i>    | QS                                                                                                                                                                                                                                                                                                                                                                                                                                                              | “Do plantations operate under conditions/support of contractual agreements?”     |
| Q23a1                                                            | <i>pmcontrFSC</i>     | B                                                                                                                                                                                                                                                                                                                                                                                                                                                               | A: yes, under FSC contract agreements                                            |
|                                                                  | noted by 89           | (identical with <i>fsc</i> )                                                                                                                                                                                                                                                                                                                                                                                                                                    |                                                                                  |
| Q23a2                                                            | <i>pmcontrWB3</i>     | B                                                                                                                                                                                                                                                                                                                                                                                                                                                               | A: yes, under WB3 contract agreements                                            |
|                                                                  | noted by 4            | -                                                                                                                                                                                                                                                                                                                                                                                                                                                               |                                                                                  |
| Q23b                                                             | <i>pmFSCjoin</i>      | QS                                                                                                                                                                                                                                                                                                                                                                                                                                                              | “In which year did you join FSC, and why did you join FSC?”                      |
| Q23b1                                                            | <i>pmFSCyear</i>      | DI                                                                                                                                                                                                                                                                                                                                                                                                                                                              | number of years the respondent is managing the plantation under FSC              |
|                                                                  | 1.3 ± 0.5 (89; 0.5-2) | Anylsing only <i>fsc</i> (1): GLM [+ <i>districtPL**</i> , + <i>plotareatot*</i> ] R <sup>2</sup> =9%                                                                                                                                                                                                                                                                                                                                                           |                                                                                  |
| Q23b2                                                            | <i>pmFSCrlearn</i>    | B                                                                                                                                                                                                                                                                                                                                                                                                                                                               | A: reason: learning (“I learned about FSC by joining information meetings”)      |
|                                                                  | noted by 14           | Only <i>fsc</i> (1), <i>districtPL</i> (1): BLR [- <i>age**</i> , + <i>plotharvestwgtI**</i> , - <i>plrlearn*</i> ] R <sup>2</sup> =41%                                                                                                                                                                                                                                                                                                                         |                                                                                  |

|       |                                  |    |                                                                                                                                                                                                                                                                |
|-------|----------------------------------|----|----------------------------------------------------------------------------------------------------------------------------------------------------------------------------------------------------------------------------------------------------------------|
| Q23b3 | <i>pmFSCrparti</i>               | B  | A: reason: mobilize (“I was mobilized to participate” or “leading as example”)                                                                                                                                                                                 |
|       | noted by 50                      |    | Only <i>fsc</i> (1): BLR [- <i>districtPL</i> **, - <i>plstcertify</i> **] R <sup>2</sup> =29%; BLR [- <i>districtPL</i> ***, - <i>plspFSC</i> **, + <i>pltharvestmax</i> **] R <sup>2</sup> =35%; Chisq [+ <i>districtAL</i> **], [- <i>districtPL</i> **]    |
| Q23b4 | <i>pmFSCrbenef</i>               | B  | A: reason: economic benefit (“I saw economic benefit in participation”)                                                                                                                                                                                        |
|       | noted by 42                      |    | Excluding <i>fsc</i> (0) and <i>districtAL</i> (1): BLR [- <i>districtPL</i> *, + <i>age</i> *, - <i>plspFSC</i> *] R <sup>2</sup> =24%; Chisq [+ <i>districtPL</i> **], (none in A Luoi)                                                                      |
| Q23b5 | <i>pmFSCrosupp</i>               | B  | A: reason: related to other types of ‘support’                                                                                                                                                                                                                 |
|       | noted by 2                       |    | -                                                                                                                                                                                                                                                              |
| Q24a  | <i>pmtpcutting</i>               | B  | “What planting method do you apply?” A: cutting propagation techniques                                                                                                                                                                                         |
|       | noted by 180 (all)               |    | -                                                                                                                                                                                                                                                              |
| Q24b1 | <i>pmthinning</i>                | O  | “Do you apply silvicultural practices in your plantations?” > thinning                                                                                                                                                                                         |
|       | no (116), not yet (39), yes (25) |    | Ordinal scale: GLM <sup>#</sup> [+ <i>sawlog</i> ***, + <i>fsc</i> ( <i>sawlog</i> ) ***, + <i>fscexploit</i> ( <i>fsc</i> ) ***, - <i>districtAL</i> × <i>fsc</i> ( <i>sawlog</i> ) *, + <i>education</i> ***, - <i>incomewagearn</i> **] R <sup>2</sup> =90% |
| Q24b2 | <i>pmthinfreq</i>                | O  | Q24b1 > “How many times do you apply thinning during a plantation rotation?”                                                                                                                                                                                   |
|       | 0 (154), 25 (1), 1 (2)           |    | -                                                                                                                                                                                                                                                              |
| Q24b3 | <i>pmthinropen</i>               | B  | Q24b1 > “What was the reason for thinning?” A: “open space for tree growth”                                                                                                                                                                                    |
|       | noted by 25                      |    | BLR [+ <i>fscexploit</i> **] R <sup>2</sup> =78%                                                                                                                                                                                                               |
| Q24b4 | <i>pmthinrsell</i>               | B  | Q24b1 > “What was the reason for thinning?” A: “to sell the wood”                                                                                                                                                                                              |
|       | noted by 23                      |    | (cf. Q24b3)                                                                                                                                                                                                                                                    |
| Q24b5 | <i>pmthintime</i>                | DI | Q24b > “If stated ‘not yet thinning’ after how many years will it be done?”                                                                                                                                                                                    |
|       | 2.8 ± 1.7 (39; 0-7)              |    | analysis of <i>pmthinning</i> (=not yet): GLM [- <i>plantduration</i> **, + <i>plrlearn</i> **] R <sup>2</sup> =50%                                                                                                                                            |
| Q24c1 | <i>pmpruning</i>                 | B  | “Do you apply silvicultural practices in your plantations?” > pruning                                                                                                                                                                                          |
|       | yes (160), no (20)               |    | Excluding <i>districtPL</i> (1) (all do pruning in PL): BLR [- <i>districtAL</i> *, + <i>plotareatot</i> *, + <i>pltharvestwtg</i> *, + <i>plottrevenmild</i> *] R <sup>2</sup> =25%                                                                           |

**Table S9.** Summary of Part 4 variables (Management of acacia plantations [year 2018]) continued. For descriptions of table content and summary statistics refer to Table S1.

| QQ No                                                            | Variable name                      | Data type                                                                                                                | Questionnaire question / information                                                            |
|------------------------------------------------------------------|------------------------------------|--------------------------------------------------------------------------------------------------------------------------|-------------------------------------------------------------------------------------------------|
| transf.                                                          | Summary statistics                 |                                                                                                                          | Statistical test and predictor variables                                                        |
| Part 4: Management of acacia plantations (year 2018) [continued] |                                    |                                                                                                                          |                                                                                                 |
| Q24c2                                                            | <i>pmprunfreq</i>                  | O                                                                                                                        | Q24c1 > “How many times do you apply pruning during a plantation rotation?”                     |
|                                                                  | 0 (20), 1 (70), 2 (90)             | OLR [ <i>+education*</i> , <i>+plsttraining*</i> , <i>+plotnumber*</i> , <i>+plottrevenmild**</i> ] R <sup>2</sup> ≈23%  |                                                                                                 |
| Q24c3                                                            | <i>pmpruntrunk</i>                 | B                                                                                                                        | Q24c1 > “What was the reason for pruning?” A: “develop the main tree trunk”                     |
|                                                                  | noted by 148                       | Only <i>pmpruning</i> (1): BLR [ <i>+plotnumber***</i> , <i>-plotchiptimb*</i> ] R <sup>2</sup> =29%                     |                                                                                                 |
| Q24c4                                                            | <i>pmprunthin</i>                  | B                                                                                                                        | Q24c1 > “What was the reason for pruning?” A: “thin out multiple trunks”                        |
|                                                                  | noted by 111                       |                                                                                                                          | Chisq [ <i>+fsc*</i> ]                                                                          |
| Q24d1                                                            | <i>pmweeding</i>                   | B                                                                                                                        | “Do you apply silvicultural practices in your plantations?” > weeding                           |
|                                                                  | yes (159), no (21)                 |                                                                                                                          | BLR [ <i>-districtAL***</i> , <i>-districtPL*</i> , <i>+plotareatot**</i> ] R <sup>2</sup> =20% |
| Q24d2                                                            | <i>pmweedfreq</i>                  | O                                                                                                                        | Q24d1 > “How many times do you weed the plots during a rotation cycle?”                         |
|                                                                  | 0 (21), 1 (31),<br>2 (110), 3 (19) | OLR [ <i>-districtAL***</i> , <i>+districtHT***</i> , <i>+plsttraining**</i> , <i>+plotnumber*</i> ] R <sup>2</sup> ≈31% |                                                                                                 |

|       |                                                                                                                                                                         |    |                                                                                                                                                                                                                                                             |
|-------|-------------------------------------------------------------------------------------------------------------------------------------------------------------------------|----|-------------------------------------------------------------------------------------------------------------------------------------------------------------------------------------------------------------------------------------------------------------|
| Q24e1 | <i>pmfertilizer</i>                                                                                                                                                     | B  | “Do you apply silvicultural practices in your plantations?” > fertilizer use                                                                                                                                                                                |
|       | yes (143),<br>no (37)                                                                                                                                                   |    | BLR [- <i>districtAL</i> ***, + <i>education</i> **, + <i>plotchiptimb</i> *, - <i>plottrevenmild</i> *, + <i>pmweedfreq</i> **, + <i>pmerosioncontrol</i> *) R <sup>2</sup> =55%; BLR [- <i>districtAL</i> ***, - <i>plotburn</i> ***] R <sup>2</sup> =39% |
| Q24e2 | <i>pmfertNPKhigh</i>                                                                                                                                                    | B  | Q24e1 > “What type of fertilizer?” A: NPK soil fertilizer mix 16:16:8                                                                                                                                                                                       |
|       | noted by 128                                                                                                                                                            |    | -                                                                                                                                                                                                                                                           |
| Q24e3 | <i>pmfertNPKlow</i>                                                                                                                                                     | B  | Q24e1 > “What type of fertilizer?” A: NPK soil fertilizer mix 10:10:5                                                                                                                                                                                       |
|       | noted by 15                                                                                                                                                             |    | -                                                                                                                                                                                                                                                           |
| Q24e4 | <i>pmfertfreq</i>                                                                                                                                                       | O  | Q24e1 > “How many times do you apply fertilizer during a rotation cycle?”                                                                                                                                                                                   |
|       | 0 (37), 1 (71), 1.5 (5), 2 (67)                                                                                                                                         |    | OLR [- <i>districtAL</i> ***, + <i>sawlog</i> ***, + <i>education</i> **, + <i>plsgovorg</i> **, - <i>plspFSC</i> **, + <i>pmerosionburn</i> *, + <i>pmweedfreq</i> **] R <sup>2</sup> ≈60%                                                                 |
| Q24f  | <i>pmharvest</i>                                                                                                                                                        | N  | “In which seasonal time do you usually harvest your acacia plots?”                                                                                                                                                                                          |
| Q24f1 | <i>pmharvestdry</i>                                                                                                                                                     | B  | A: during the dry season                                                                                                                                                                                                                                    |
|       | noted by 106                                                                                                                                                            |    | BLR [+ <i>sawlog</i> ***, + <i>districtHT</i> ***, + <i>plantduration</i> **, - <i>pmintercroppass</i> *, + <i>pmerosioncontrol</i> *) R <sup>2</sup> =29%                                                                                                  |
| Q24f2 | <i>pmharvestwet</i>                                                                                                                                                     | B  | A: during the rainy season                                                                                                                                                                                                                                  |
|       | noted by 4                                                                                                                                                              |    | (Phu Loc only)                                                                                                                                                                                                                                              |
| Q24f3 | <i>pmharvestdep</i>                                                                                                                                                     | B  | A: it depends on economic and logistic circumstances                                                                                                                                                                                                        |
|       | noted by 70                                                                                                                                                             |    | BLR [- <i>sawlog</i> ***, - <i>districtHT</i> ***, - <i>education</i> *, - <i>plantduration</i> ***, + <i>pltsel-ling</i> *, - <i>pmerosioncontrol</i> *) R <sup>2</sup> =30%                                                                               |
| Q24f4 | <i>pmharvreason</i>                                                                                                                                                     | N  | “Why do you harvest during that time?”                                                                                                                                                                                                                      |
|       | A: “it is easy for harvesting and transport” (115); “it depends on economic conditions” (59); “the wood is heavy” (4); “the price for selling is good in that time” (2) |    | “easy transport”: <i>pmharvestdry</i> >(102), <i>pmharvestdep</i> >(13); “economic conditions”: <i>pmharvestdep</i> >(57), <i>pmharvest-dry</i> >(2); “wood is heavy”: only <i>pmharvestwet</i> >(4); “price is good: only <i>pmharvestdry</i> >(2)         |
| Q24g  | <i>pmreplantcy</i>                                                                                                                                                      | QS | “How many days does it take from harvesting to the time you replant the plots?”                                                                                                                                                                             |
| Q24g1 | <i>pmreplantsdl</i>                                                                                                                                                     | B  | A: “as soon as I have money to buy seedlings”                                                                                                                                                                                                               |
|       | noted by 25                                                                                                                                                             |    | BLR [+ <i>districtAL</i> ***, + <i>plotahybrid</i> **, - <i>pmfertfreq</i> **, + <i>incomewagearn</i> *) R <sup>2</sup> =62%<br>analysed for ALD only: BLR [+ <i>plotahybrid</i> **, - <i>pmfertfreq</i> **, + <i>incomewagearn</i> *) R <sup>2</sup> =46%  |
| Q24g2 | <i>pmreplantday</i>                                                                                                                                                     | O  | ordinal category in days (from less than one to more than two months)                                                                                                                                                                                       |
|       | <30 (64); 30-60 (50); >60 (41)                                                                                                                                          |    | Only <i>pmreplantsdl</i> (0): OLR [- <i>fsc</i> *, + <i>districtAL</i> ***, - <i>districtPL</i> ***, - <i>plestlandlive(y/n)</i> *, - <i>plotnumber</i> *, - <i>plotharvestwgtl</i> *, - <i>pmerosioncontrol</i> **] R <sup>2</sup> ≈64%                    |
| Q25   | <i>pmchange</i>                                                                                                                                                         | N  | “Since you started planting acacias did you change any management regime?”                                                                                                                                                                                  |
| Q25a  | <i>pmchshortlong</i>                                                                                                                                                    | B  | A: “Yes, I changed from short to longer-term rotations of plantations.”                                                                                                                                                                                     |
|       | noted by 99                                                                                                                                                             |    | Only <i>sawlog</i> (1): BLR [+ <i>fsc</i> **, + <i>education</i> *, + <i>districtAL</i> **, + <i>pmerosioncontrol</i> **] R <sup>2</sup> =46%                                                                                                               |
| Q25b  | <i>pmchchiptimb</i>                                                                                                                                                     | B  | A: “Yes, I changed from woodchip to timber plantation management.”                                                                                                                                                                                          |
|       | noted by 66                                                                                                                                                             |    | Only <i>sawlog</i> (1): BLR [+ <i>fscexploit</i> ***, - <i>districtPL</i> *, - <i>plneedloan</i> *, + <i>pmprunfreq</i> *) R <sup>2</sup> =23%                                                                                                              |

**Table S10.** Summary of Part 4 variables (Management of acacia plantations [year 2018]) continued. For descriptions of table content and summary statistics refer to Table S1.

| QQ No                                                            | Variable name        | Data type                                | Questionnaire question / information                                                                                                                                                                                                                                                               |
|------------------------------------------------------------------|----------------------|------------------------------------------|----------------------------------------------------------------------------------------------------------------------------------------------------------------------------------------------------------------------------------------------------------------------------------------------------|
| transf.                                                          | Summary statistics   | Statistical test and predictor variables |                                                                                                                                                                                                                                                                                                    |
| Part 4: Management of acacia plantations (year 2018) [continued] |                      |                                          |                                                                                                                                                                                                                                                                                                    |
| Q25c                                                             | <i>pmchjoinfsc</i>   | B                                        | A: “Yes, I changed from non-FSC to FSC-certified plantation management.”                                                                                                                                                                                                                           |
|                                                                  | noted by 80          |                                          | -                                                                                                                                                                                                                                                                                                  |
| Q25d                                                             | <i>pmchnointcrop</i> | B                                        | A: “Yes, I changed from intercropping to no intercropping.”                                                                                                                                                                                                                                        |
|                                                                  | noted by 26          |                                          | BLR [ <i>+fscexploit</i> × <i>district</i> ***, <i>+plotahybrid</i> **] R <sup>2</sup> =15% ; excluding ALD:<br>BLR [ <i>-plotareatot</i> *, <i>+plspWWF</i> ***] R <sup>2</sup> =10%                                                                                                              |
| Q25e                                                             | <i>pmchseedcut</i>   | B                                        | A: “Yes, I changed from seeding to cutting propagation techniques.”                                                                                                                                                                                                                                |
|                                                                  | noted by 55          |                                          | excluding ALD: BLR [ <i>+plantduration</i> **, <i>+plotareatot</i> *, <i>+plneedloan</i> *) R <sup>2</sup> =18%                                                                                                                                                                                    |
| Q25f                                                             | <i>pmchthinning</i>  |                                          | A: “Yes, I started to do thinning in plantations.”                                                                                                                                                                                                                                                 |
|                                                                  | noted by 18          |                                          | (only FSC-farmers in Phu Loc)                                                                                                                                                                                                                                                                      |
| Q25g                                                             | <i>pmchpruning</i>   |                                          | A: “Yes, I started to do pruning in plantations.”                                                                                                                                                                                                                                                  |
|                                                                  | noted by 13          |                                          | (nine in Phu Loc)                                                                                                                                                                                                                                                                                  |
| Q25h                                                             | <i>pmchweeding</i>   | B                                        | A: “Yes, I changed from no weeding to weed management.”                                                                                                                                                                                                                                            |
|                                                                  | noted by 55          |                                          | <i>pmweeding</i> (1) only: BLR [ <i>+districtPL</i> ***, <i>+age</i> *, <i>-firsteucalypt</i> *, <i>+fscexploit</i> *) R <sup>2</sup> =13%                                                                                                                                                         |
| Q25i                                                             | <i>pmchfertilize</i> |                                          | A: “Yes, I started to apply fertilizer in plantations.”                                                                                                                                                                                                                                            |
|                                                                  | noted by 19          |                                          | BLR [ <i>+districtPL</i> ***, <i>-plotharvestwgtI</i> **, <i>-incomewageearn</i> **] R <sup>2</sup> =18%                                                                                                                                                                                           |
| Q25j                                                             | <i>pmchnopest</i>    | B                                        | A: “Yes, I changed from using pesticides to not using pesticides.”                                                                                                                                                                                                                                 |
|                                                                  | noted by 53          |                                          | BLR [ <i>-districtHT</i> ***, <i>sawlog</i> × <i>district</i> *, <i>fscexploit</i> × <i>district</i> *, <i>+plotareatot</i> *,<br><i>+plotchiptimb</i> **] R <sup>2</sup> =15%                                                                                                                     |
| Q25k                                                             | <i>pmchmachine</i>   | B                                        | A: “Yes, I changed from hand management to using machines.”                                                                                                                                                                                                                                        |
|                                                                  | noted by 124         |                                          | BLR [ <i>-districtAL</i> ***, <i>+education</i> *, <i>-incomewageearn</i> *, <i>+pmerosioncontrol</i> **] R <sup>2</sup> =35%                                                                                                                                                                      |
| Q25l                                                             | <i>pmchnoburn</i>    | B                                        | A: “Yes, I changed from post-harvest plot burning to no use of fires.”                                                                                                                                                                                                                             |
|                                                                  | noted by 43          |                                          | BLR [ <i>-districtAL</i> *, <i>+fsc</i> **, <i>+fscexploit</i> *, <i>-plotburn%</i> ***] R <sup>2</sup> =34%                                                                                                                                                                                       |
| Q26                                                              | <i>selltowhom</i>    | N                                        | “To whom do you sell your acacia products?”                                                                                                                                                                                                                                                        |
| Q26a                                                             | <i>sellmiddle</i>    | B                                        | A: to a middle-man                                                                                                                                                                                                                                                                                 |
|                                                                  | noted by 141         |                                          | BLR [ <i>-fscexploit</i> *, <i>-plotareatot</i> ***, <i>-plspWWF</i> ***] R <sup>2</sup> =55%<br>BLR [ <i>-fscexploit</i> ***, <i>-plotareatot</i> ***, <i>-plstcertify</i> *) R <sup>2</sup> =51%<br>BLR [ <i>-fscexploit</i> ***, <i>-plotareatot</i> ***, <i>-plsngo</i> *) R <sup>2</sup> =51% |
| Q26b                                                             | <i>sellmill</i>      | B                                        | A: directly to the paper/saw mill                                                                                                                                                                                                                                                                  |
|                                                                  | noted by 42          |                                          | BLR [ <i>+fscexploit</i> ***, <i>+plotareatot</i> ***, <i>+plsngo</i> **] R <sup>2</sup> =54%; BLR [ <i>+fscexploit</i> *, <i>+plotareatot</i> **, <i>+plspWWF</i> ***, <i>+plstcertify</i> *, <i>-plstselling</i> *) R <sup>2</sup> =54%                                                          |
| Q27                                                              | <i>harvestbywho</i>  | N                                        | “Who is cutting the trees during harvest time?”                                                                                                                                                                                                                                                    |
| Q27a                                                             | <i>harvowner</i>     | B                                        | A: the owner (respondent)                                                                                                                                                                                                                                                                          |
|                                                                  | noted by 10          |                                          | (four FSC-farmers in HT, five in PL; one non-FSC-farmer in PL; none in AL); analysed for <i>sellmill</i> (1): BLR [ <i>+education</i> ***, <i>+plantduration</i> ***, <i>-plotareatot</i> ***] R <sup>2</sup> =49%; T-test [ <i>-age</i> ]*                                                        |
| Q27b                                                             | <i>harvbuyer</i>     | B                                        | A: the buyer of the wood                                                                                                                                                                                                                                                                           |

|      |                     |                                                                                                                                                                                                                                                                                                                 |                                                                          |
|------|---------------------|-----------------------------------------------------------------------------------------------------------------------------------------------------------------------------------------------------------------------------------------------------------------------------------------------------------------|--------------------------------------------------------------------------|
|      | noted by 139        | (all except two identical with <i>sellmiddle</i> ) (all except three non-FSC-farmers); analysed for FSC-farmers only: BLR [- <i>fscexploit</i> ***, - <i>plsngo</i> ***, + <i>pmintercropcass</i> *] $R^2=37\%$ ; BLR [- <i>fscexploit</i> ***, <i>district</i> *] $R^2=28\%$ ; Chisq [+ <i>districtAL</i> ***] |                                                                          |
| Q27c | <i>harvteamhire</i> | B                                                                                                                                                                                                                                                                                                               | A: “I hire a team to do the harvesting.”                                 |
|      | noted by 34         | (all except two <i>sellmill</i> ) (all except three FSC-farmers); analysed for FSC-farmers: BLR [+ <i>fscexploit</i> **, + <i>age</i> *, + <i>education</i> **, + <i>plsngo</i> *, + <i>plneedloan</i> *, - <i>pmintercropcass</i> *] $R^2=38\%$ ; Chisq [- <i>districtAL</i> **]                               |                                                                          |
| Q28  | <i>transpywho</i>   | N                                                                                                                                                                                                                                                                                                               | “Who is transporting the wood products to the factory after harvesting?” |
| Q28a | <i>transpowner</i>  | B                                                                                                                                                                                                                                                                                                               | A: the owner (respondent)                                                |
|      | noted by 10         | (same as Q27a)                                                                                                                                                                                                                                                                                                  |                                                                          |
| Q28b | <i>transpbuyer</i>  | B                                                                                                                                                                                                                                                                                                               | A: the buyer of the wood                                                 |
|      | noted by 138        | (two harvesters not transporting, one tr. not harvesting; otherwise same as Q27c)                                                                                                                                                                                                                               |                                                                          |

**Table S11.** Summary of Part 4 variables (Management of acacia plantations [year 2018]) continued. For descriptions of table content and summary statistics refer to Table S1.

| QQ No                                                            | Variable name         | Data type                                                                                                                                                                                                                                                                                                                                                                  | Questionnaire question / information                                         |
|------------------------------------------------------------------|-----------------------|----------------------------------------------------------------------------------------------------------------------------------------------------------------------------------------------------------------------------------------------------------------------------------------------------------------------------------------------------------------------------|------------------------------------------------------------------------------|
| transf.                                                          | Summary statistics    |                                                                                                                                                                                                                                                                                                                                                                            | Statistical test and predictor variables                                     |
| Part 4: Management of acacia plantations (year 2018) [continued] |                       |                                                                                                                                                                                                                                                                                                                                                                            |                                                                              |
| Q28c                                                             | <i>transpteamhire</i> | B                                                                                                                                                                                                                                                                                                                                                                          | A: “I hire a team to do the transport.”                                      |
|                                                                  | noted by 33           |                                                                                                                                                                                                                                                                                                                                                                            | (one harvester team not transporting; otherwise same as Q27c)                |
| Q29                                                              | <i>hirelabor</i>      | B                                                                                                                                                                                                                                                                                                                                                                          | “Do you hire labor to work on your acacia plantations?”                      |
|                                                                  | yes (153),<br>no (37) | BLR [ <i>+fscexploit*</i> , <i>-districtPL***</i> , <i>+plotareatot**</i> , <i>+plsngo**</i> , <i>-pmthinning**</i> , <i>+pmprufreq**</i> ] R <sup>2</sup> =21%; BLR [ <i>-districtPL***</i> , <i>-genderW*</i> , <i>+plotnumber***</i> , <i>-plotchiptimb**</i> , <i>+plottrevenmild*</i> , <i>-plotsidefirewd**</i> ] R <sup>2</sup> =31%; Chisq [ <i>-districtPL*</i> ] |                                                                              |
| Q30                                                              | <i>hiredbyother</i>   | B                                                                                                                                                                                                                                                                                                                                                                          | “Do you work on acacia plantations which are owned by others?”               |
|                                                                  | yes (103),<br>no (77) | BLR [ <i>+districtAL**</i> , <i>-age*</i> , <i>-education*</i> , <i>-plrprogram***</i> , <i>-plstraining**</i> ] R <sup>2</sup> =37%; BLR [ <i>+districtPL*</i> , <i>-age**</i> , <i>-education*</i> , <i>+plrlearn*</i> , <i>-pmfertfreq***</i> , <i>+incomewagearn***</i> ] R <sup>2</sup> =44%; Chisq [ <i>+districtAL*</i> ]                                           |                                                                              |
| Q31                                                              | <i>pmriparian</i>     | B                                                                                                                                                                                                                                                                                                                                                                          | “Did you plant acacia trees near the water streams?”                         |
|                                                                  | yes (75),<br>no (105) | BLR [ <i>-districtHT*</i> , <i>-plspPr661*</i> , <i>+plstloan*</i> , <i>-plstfertilizer*</i> , <i>-plotharvestmax**</i> , <i>+pmintercropcass*</i> , <i>+pmweedfreq*</i> ] R <sup>2</sup> =12%; Chisq [ <i>-sawlog**</i> ] [ <i>-fsc**</i> ]                                                                                                                               |                                                                              |
| Q32a                                                             | <i>naturalsafe</i>    | QS                                                                                                                                                                                                                                                                                                                                                                         | “Did you plant/conserve/safeguard natural vegetation in specific locations?” |
|                                                                  | yes (78),<br>no (102) | BLR [ <i>+education*</i> , <i>-plspnone*</i> , <i>-plspPr327*</i> , <i>+plestlandlive(o)**</i> , <i>+plotharvestmax***</i> , <i>+pmersioncontrol**</i> , <i>+pmersionSAFEV***</i> , <i>-pmriparian**</i> ] R <sup>2</sup> =71%; Chisq [ <i>+fsc***</i> ]                                                                                                                   |                                                                              |
| Q32b1                                                            | <i>natHopea</i>       | B                                                                                                                                                                                                                                                                                                                                                                          | “If yes, please specify the species” > A: <i>Hopea odorata</i>               |
|                                                                  | noted by 52           | analysis of <i>naturalsafe</i> (1) only: BLR [ <i>-districtAL**</i> , <i>+fsc***</i> , <i>+plotdistmean**</i> ] R <sup>2</sup> =37%                                                                                                                                                                                                                                        |                                                                              |
| Q32b2                                                            | <i>natHomalium</i>    | B                                                                                                                                                                                                                                                                                                                                                                          | “If yes, please specify the species” > A: <i>Homalium hainanense</i>         |
|                                                                  | noted by 19           | <i>naturalsafe</i> (1) only: BLR [ <i>+plsngo**</i> , <i>+buyplarea*</i> , <i>+plotdistmax*</i> , <i>+plotFSC%*</i> ] R <sup>2</sup> =39%                                                                                                                                                                                                                                  |                                                                              |
| Q32b3                                                            | <i>natnatshrub</i>    | B                                                                                                                                                                                                                                                                                                                                                                          | “If yes, please specify the species” > A: naturally growing shrubs           |



|       |                     |                                                                                                                                                                                                                                                                                                                                                                                                                              |                                                                          |
|-------|---------------------|------------------------------------------------------------------------------------------------------------------------------------------------------------------------------------------------------------------------------------------------------------------------------------------------------------------------------------------------------------------------------------------------------------------------------|--------------------------------------------------------------------------|
|       | noted by 39         | <i>naturalsafe</i> (1) only: BLR [ <i>+districtAL**</i> , <i>-districtAL*</i> , <i>+education*</i> , <i>-plotFSC%***</i> , <i>-natHopea***</i> , <i>+pmerosioncontrol**</i> , <i>+pmharvestdry**</i> , <i>-pmriparian***</i> ] R <sup>2</sup> =44%                                                                                                                                                                           |                                                                          |
| Q32b4 | <i>natbamboo</i>    | B                                                                                                                                                                                                                                                                                                                                                                                                                            | “If yes, please specify the species” > A: bamboo                         |
|       | noted by 5          | (three in HT, two in PL)                                                                                                                                                                                                                                                                                                                                                                                                     |                                                                          |
| Q32b5 | <i>natChukrasia</i> | B                                                                                                                                                                                                                                                                                                                                                                                                                            | “If yes, please specify the species” > A: <i>Chukrasia tabularis</i>     |
|       | noted by 4          | (FSC-farmers, three in HT, one in PL)                                                                                                                                                                                                                                                                                                                                                                                        |                                                                          |
| Q32c1 | <i>naterosionc</i>  | B                                                                                                                                                                                                                                                                                                                                                                                                                            | “Why do you plant/conservate natural species” > for erosion control      |
|       | noted by 50         | all <i>naturalsafe</i> ; analysing <i>naturalsafe</i> (1) only: BLR [ <i>-districtHT*</i> , <i>+age*</i> , <i>+education*</i> , <i>+plotchip-timb*</i> , <i>+plstloan*</i> , <i>-plotburn%*</i> , <i>+pmerosionburn*</i> ] R <sup>2</sup> =27%; BLR [ <i>+age*</i> , <i>+plotchiptimb*</i> , <i>-pls-govorg*</i> , <i>+plsngo*</i> , <i>+plstloan***</i> , <i>-plotburn%*</i> , <i>+pmerosionburn*</i> ] R <sup>2</sup> =32% |                                                                          |
| Q32c2 | <i>natboundary</i>  | B                                                                                                                                                                                                                                                                                                                                                                                                                            | “Why do you plant/conservate natural species” > as a boundary line       |
|       | noted by 31         | all <i>naterosionc</i> ; analysing <i>naterosionc</i> (1) only: BLR [ <i>+plspWWF***</i> , <i>+plstcertify*</i> ] R <sup>2</sup> =47%; Chisq [ <i>+plsttraining***</i> ]                                                                                                                                                                                                                                                     |                                                                          |
| Q32c3 | <i>natcontrpest</i> | B                                                                                                                                                                                                                                                                                                                                                                                                                            | “Why do you plant/conservate natural species” > for pest species control |
|       | noted by 21         | all except one <i>naterosionc</i> ; all <i>plspWWF</i> , and all <i>plsttraining</i>                                                                                                                                                                                                                                                                                                                                         |                                                                          |

## Supplementary S2: additional notes

### *Some limitations of the study, and specifications*

The study only focussed on acacia tree farmers present in 2018; it did not focus on those who had given up on agriculture and/or plantations (e.g. emigrants to industries in cities) or those farmers who never participated in the ‘acacia boom’. Furthermore, the poorer smallholders (mainly with woodchip-producing plantations) were in reality somewhat underrepresented, since the study aimed to set some focus on timber-producing farmers with and without FSC.

In contrast to closed questions, the open questions of the questionnaire did not limit the range of possible answers, but to some degree the responses were perhaps influenced by the respondents’ nature and interaction with the interviewer. As the study collected information about the history of involvement in plantations certain perceptive biases relating to the memory of respondents may have occurred. Biases may also result from differences of socio-political context and past exposure to specific perspectives. For example, certain training programs may have implanted specific environmental ideas which are now considered important. Whilst respondents who had not participated in such programs may be less explicit and/or focussed on particular issues, this does not exclude the possibility that they also apply certain potentially effective strategies to deal with such issues, within the constraints of their potentials.

Some caution may also be advised with a certain type of reading. We often refer to effects of specific variables. Such variables may not always represent cogent ‘causative factors’ by themselves; they may also be indicators of connected/related causes or patterns. For example, ‘higher education’ does not merely mean ‘more knowledge’ but usually also implies other things, such as better connections within dominant socio-political networks, better access to information, and/or more experience vis-à-vis policy contexts and economic trends. Having noted this, we nonetheless usually refer to specific variables (e.g. ‘level of education’, which refers to the variable ‘years of schooling’, cf. Supplement S1) if these are statistically dominant as predictors over other related and/or correlated variables (for example, past ‘participation in training programs’ or ‘honorary position’), assuming that such statistical dominance imports stronger reliability of results/information (but obviously within constraints of general logical pertinence).
